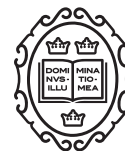

## Review Article

# ***Scedosporium* and *Lomentospora*: an updated overview of underrated opportunists**

**Andoni Ramirez-Garcia<sup>1,\*</sup>, Aize Pellon<sup>1</sup>, Aitor Rementeria<sup>1</sup>, Idoia Buldain<sup>1</sup>, Eliana Barreto-Bergter<sup>2</sup>, Rodrigo Rollin-Pinheiro<sup>2</sup>, Jardel Vieira de Meirelles<sup>2</sup>, Mariana Ingrid D. S. Xisto<sup>2</sup>, Stephane Ranque<sup>3</sup>, Vladimir Havlicek<sup>4</sup>, Patrick Vandeputte<sup>5,6</sup>, Yohann Le Govic<sup>5,6</sup>, Jean-Philippe Bouchara<sup>5,6</sup>, Sandrine Giraud<sup>6</sup>, Sharon Chen<sup>7</sup>, Johannes Rainer<sup>8</sup>, Ana Alastruey-Izquierdo<sup>9</sup>, Maria Teresa Martin-Gomez<sup>10</sup>, Leyre M. López-Soria<sup>11</sup>, Javier Peman<sup>12</sup>, Carsten Schwarz<sup>13</sup>, Anne Bernhardt<sup>14</sup>, Kathrin Tintelnot<sup>14</sup>, Javier Capilla<sup>15</sup>, Adela Martin-Vicente<sup>15,16</sup>, Jose Cano-Lira<sup>15</sup>, Markus Nagl<sup>17</sup>, Michaela Lackner<sup>17</sup>, Laszlo Irinyi<sup>18</sup>, Wieland Meyer<sup>18</sup>, Sybren de Hoog<sup>19</sup> and Fernando L. Hernando<sup>1</sup>**

<sup>1</sup>Fungal and Bacterial Biomics Research Group, Department of Immunology, Microbiology and Parasitology, Faculty of Science and Technology, University of the Basque Country (UPV/EHU), Leioa, Spain, <sup>2</sup>Instituto de Microbiologia, UFRJ, Rio de Janeiro, RJ, Brazil, <sup>3</sup>Laboratoire de Parasitologie-Mycologie, AP-HM / CHU Timone, Marseille, France, <sup>4</sup>Institute of Microbiology, Academy of Sciences of the Czech Republic, Prague, Czech Republic, <sup>5</sup>Laboratoire de Parasitologie-Mycologie, CHU, Angers, France, <sup>6</sup>Host-Pathogen Interaction Study Group (EA 3142), UNIV Angers, UNIV Brest, Angers, France, <sup>7</sup>Centre for Infectious Diseases and Microbiology Laboratory Services, ICPMR, Westmead Hospital, The University of Sydney, New South Wales, Australia, <sup>8</sup>Institute of Microbiology, Leopold-Franzens University Innsbruck, Austria, <sup>9</sup>Mycology Reference Laboratory, National Centre for Microbiology, Instituto de Salud Carlos III. Majadahonda, Madrid, Spain, <sup>10</sup>Microbiology Department, Hospital Universitari Vall d'Hebron, Barcelona, Spain, <sup>11</sup>Microbiology Department, Hospital Universitario Cruces, Barakaldo, Spain, <sup>12</sup>Microbiology Department, Hospital Universitario y Politécnico La Fe, Valencia, Spain, <sup>13</sup>Cystic Fibrosis Centre Berlin/Charité-Universitätsmedizin Berlin, Germany, <sup>14</sup>Mycotic and Parasitic Agents and Mycobacteria, Robert Koch Institute, Berlin, Germany, <sup>15</sup>Mycology Unit, Medical School and IISPV, Universitat Rovira i Virgili, Reus, Spain, <sup>16</sup>Department of Clinical Pharmacy and Translational Science, University of Tennessee Health Science Center, Memphis, TN USA, <sup>17</sup>Division of Hygiene and Medical Microbiology, Medical University of Innsbruck, Innsbruck, Austria, <sup>18</sup>Molecular Mycology Research Laboratory, Centre for Infectious Diseases and Microbiology, Westmead Clinical School, Sydney Medical School – Westmead Hospital, Marie Bashir Institute for Infectious Diseases and Biosecurity, The University of Sydney, Westmead Institute for Medical Research, Sydney, New South Wales, Australia and <sup>19</sup>Westerdijk Fungal Biodiversity Institute, Utrecht, The Netherlands

\*To whom correspondence should be addressed. Dr. Andoni Ramirez-Garcia, Department of Immunology, Microbiology and Parasitology, Faculty of Science and Technology, University of the Basque Country (UPV/EHU), Leioa 48940, Bizkaia, Spain. Tel: +34-946-015090; Fax: +34-946-013500; E-mail: [andoni.ramirez@ehu.eus](mailto:andoni.ramirez@ehu.eus)

Received 1 June 2017; Revised 17 August 2017; Accepted 10 October 2017; Editorial Decision 8 September 2017

## Abstract

Species of *Scedosporium* and *Lomentospora* are considered as emerging opportunists, affecting immunosuppressed and otherwise debilitated patients, although classically they are known from causing trauma-associated infections in healthy individuals. Clinical manifestations range from local infection to pulmonary colonization and severe invasive disease, in which mortality rates may be over 80%. These unacceptably high rates are due to the clinical status of patients, diagnostic difficulties, and to intrinsic antifungal resistance of these fungi. In consequence, several consortia have been founded to increase research efforts on these orphan fungi. The current review presents recent findings and summarizes the most relevant points, including the *Scedosporium/Lomentospora* taxonomy, environmental distribution, epidemiology, pathology, virulence factors, immunology, diagnostic methods, and therapeutic strategies.

**Key words:** fungi, pathogen, emergent, infection.

## Introduction

Nearly all pathogenic fungi are present in the environment adapted to very different habitats where they play varying roles in recycling of organic matter. With some of their causative agents being either opportunistic or primary pathogens, fungal infections show an increasing incidence worldwide, affecting millions of individuals, with mortality rates that may be higher than 50% in susceptible patient populations.<sup>1</sup>

Among pathogenic fungi, *Scedosporium* species, including *Lomentospora prolificans* (formerly *Scedosporium prolificans*),<sup>2</sup> can cause infections in both immunocompetent and immunocompromised hosts, where they can act as primary or opportunistic pathogens.<sup>3,4</sup> These species cause a broad range of clinical manifestations, from colonization of the respiratory tract, superficial infections and allergic reactions, to severe invasive localized or disseminated mycoses. Patients at risk are particularly those immunocompromised and with hematological malignancies.<sup>3,5</sup> Individuals suffering from near-drowning events in water polluted with fungal propagules are also at risk of infections with central nervous system (CNS) involvement.<sup>5</sup>

Moreover, *Scedosporium/Lomentospora* are among the most commonly recovered fungi from respiratory secretions of patients suffering from chronic pulmonary conditions such as cystic fibrosis (CF).<sup>6</sup> Although they are mostly asymptomatic colonizers,<sup>7,8</sup> this may be the first step toward pathology. *L. prolificans* typically causes disseminated infections in immunocompromised patients, where it is associated with high mortality.<sup>3,8–11</sup> *Scedosporium boydii* and *S. apiospermum* are the most frequently isolated species, but in some regions *S. aurantiacum* is more common. The high degrees of intrinsic antifungal resistance make these infections difficult to manage.<sup>12</sup>

The high mortality rates of deep and disseminated infections necessitate focusing resources and efforts to cope with the challenges posed by *Scedosporium* and *Lomentospora* species, such as improving diagnostic methods, or designing new effective therapies.

Therefore, the members of the *Scedosporium* working group of the International Society for Human and Animal Mycology (ISHAM), present at their 5<sup>th</sup> Workshop in Bilbao in 2016, decided to prepare a detailed review describing the taxonomy, environmental distribution, epidemiology, pathology, virulence factors, immunology, diagnostic methods, and available therapeutic strategies.

## Taxonomy, DNA barcoding, and new species

The nomenclature of the genus *Scedosporium/Pseudallescheria* has undergone numerous changes over the last decade following the introduction of molecular phylogenetics, which led to an increasing resolution at and below the species level. In addition, the fundamental change in fungal taxonomy allowing only a single name per fungal species, effectively abolishing the dual nomenclature based on the anamorph/teleomorph concept,<sup>13</sup> resulted in the adoption of the name *Scedosporium* at the expense of *Pseudallescheria*.<sup>2</sup>

The first comprehensive revision of the genus conducted in 2005 by Gilgado et al.<sup>14</sup> using four genetic loci ( $\beta$ -tubulin (BT2 (= exon 2–4) and TUB (= exon 5–6)), calmodulin and the internal transcribed spacer regions (ITS1/2) of the rDNA gene cluster) recognized *S. apiospermum* (incl. *P. boydii*) as a species complex, in addition to *S. aurantiacum* and *S. minutisporum*. Within the *S. apiospermum/P. boydii* complex, three existing species were recognized: *P. angusta*, *P. ellipsoidea*, and *P. fusioidea*.<sup>14</sup> A second revision further recognised a new species *S. dehoogii* and maintained *S. apiospermum* and *P. boydii* as distinct species

based on *TUB* sequences together with morphological and physiological criteria.<sup>15</sup> A significant genetic diversity within the *S. apiospermum*/*P. boydii* complex was noted in sequence analysis of the D1/D2 region of the LSU of rDNA, ITS1/2 and elongation factor 1- $\alpha$ ;<sup>16</sup> ITS1/2 and *BT2*<sup>17,18</sup> and the actin, *BT2* and small ribosomal protein 60S L10 (*RP60S*) sequences in combination with AFLP analysis.<sup>19</sup> While the use of some loci, such as *BT2*, show better discriminatory resolution, barcoding of the ITS1/2 regions is sufficient for distinction of all relevant entities in clinical practice.<sup>19</sup> Rainer and Kaltseis (2010) described a new species *S. deficiens*,<sup>20</sup> closely related to *S. dehoogii* based on ITS1/2 and *BT2* corresponding with growth differences on polyvinyl alcohol agar supplemented with diesel and rapeseed oil, and growth at 41°C, but no reference sequences were submitted to any public database, and insufficient proof of novelty was provided. Recently another new species phylogenetically related to *S. aurantiacum* was described, based on ITS, *BT2* and calmodulin, named *S. cereisporum*.<sup>21</sup> In summary, after the One Fungus = One Name movement<sup>22</sup> and sequencing studies, the genus *Scedosporium* now contains the following 10 species: *S. aurantiacum*, *S. minutisporum*, *S. desertorum*, *S. cereisporum*, and *S. dehoogii*, in addition to the *S. apiospermum* complex that comprises *S. angustum*, *S. apiospermum*, *S. boydii*, *S. ellipsoideum*, and *S. fusoidium* (Fig. 1).

A phylogenetic analysis of 104 *TUB* sequences (Fig. 1), representative of all subgroups found among 407 analyzed *TUB* sequences, as well as an analysis of the intra-species variation of all 10 currently accepted *Scedosporium* species revealed high genetic variation within *S. dehoogii*, *S. boydii*, and *S. apiospermum* (Fig. 2), indicating that those should be treated as species complexes, and the identified subclades may indicate cryptic species. This was also confirmed by DNA barcoding gap analysis carried out on 538 ITS (Fig. 3A) and 407 *TUB* sequences (Fig. 3B), showing that there is no barcoding gap within the genus *Scedosporium* if all current ten species are included. The loss of the barcoding gap is due to the high genetic variation found within *S. dehoogii*, *S. boydii*, and *S. apiospermum*. However, the description of those subclades as separate species needs further study, including molecular data in association with morphological, physiological, and clinical relevant data. There are clear barcoding gaps between *S. minutisporum*, *S. desertorum*, *S. aurantiacum*, and *S. cereisporum* (Fig. 3C) indicating that they are well-defined species. The separation of *S. angustum* and *S. fusoidium* needs to be further investigated, taking into account the low genetic diversity within and between those two species, when compared to the genetic variation found in *S. dehoogii*, *S. boydii*, and *S. apiospermum* (Fig. 1 and 2). Finally, *L. prolificans* was shown to be unrelated to *Scedosporium* and therefore was

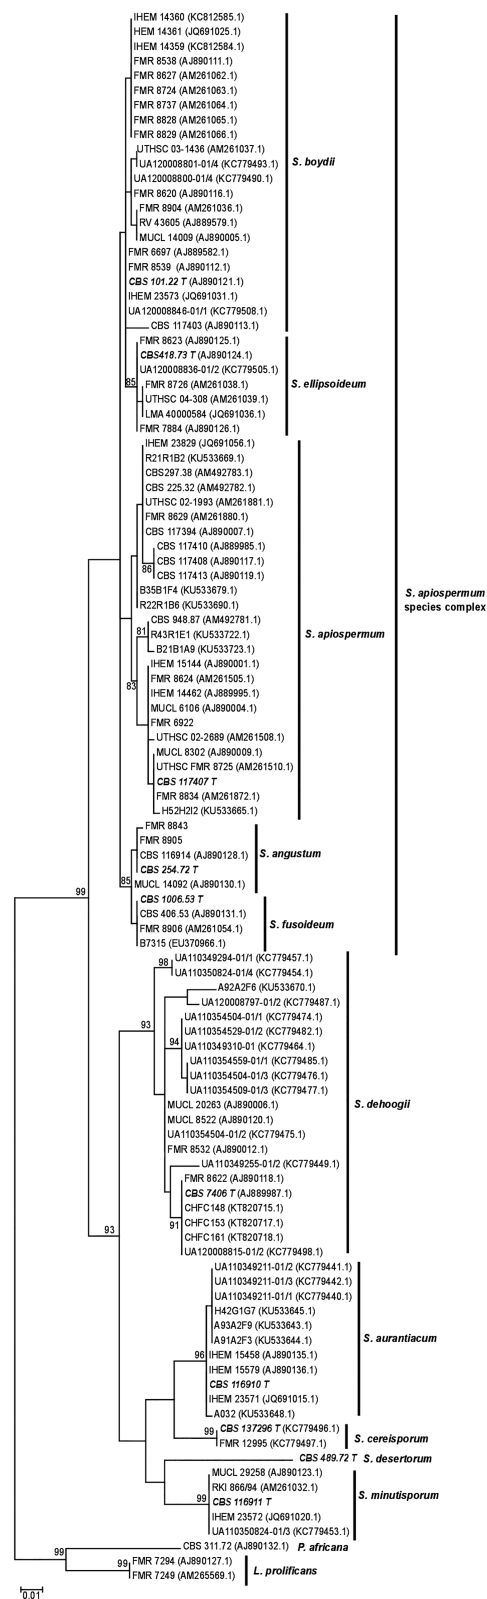

**Figure 1.** Phylogenetic tree of *Scedosporium* species based on 104 tubulin sequences (*TUB*, exon 5 and 6) representing the currently known genetic variation, using Maximum Likelihood analysis (GTR+G model). Bootstrap values above 80 are indicated at the nodes. Type strains are in bold italics. *Petriellopsis africana* and *Lomentospora prolificans* are used as outgroups.

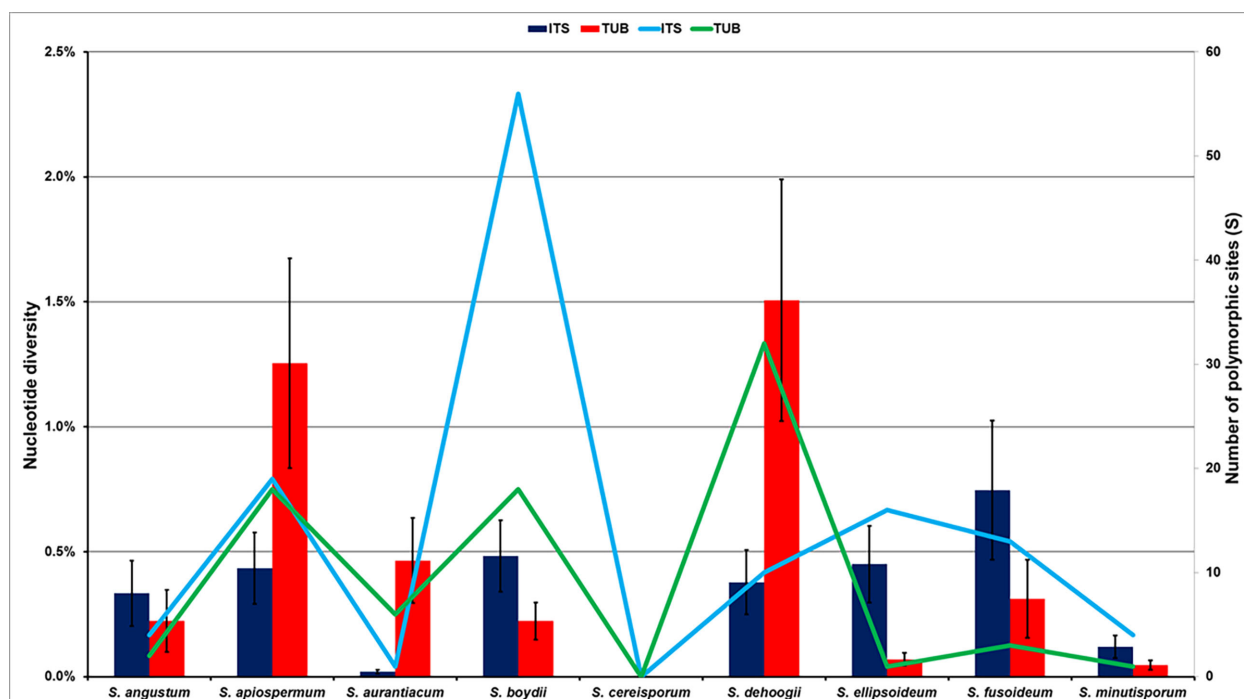

**Figure 2.** Nucleotide diversity ( $\pi$ ) in % and number of polymorphic sites (S) in the ITS1/2 regions (dark blue bar and light blue line, respectively) and  $\beta$ -tubulin gene (*TUB*, exon 5 and 6) (red bar and green line, respectively) of the nine of the ten currently accepted *Scedosporium* species for which sequences from more than one strain were available.

reclassified as *Lomentospora prolificans*,<sup>23</sup> and the genus *Lomentospora* was reinstated for this species.<sup>2</sup>

### Environmental distribution and epidemiology

Knowledge of the ecological niches of *Scedosporium*/*Lomentospora* species is essential for a better understanding of the dispersal of these fungi and for the potential identification of a source of an infection.

### Ecological aspects

*Scedosporium* and *Lomentospora* species have been isolated from a wide range of environments, including anthropogenic influenced habitats,<sup>24,25</sup> oil-soaked soils, cattle dung, and sewage.<sup>26</sup> In addition, polluted waters have been described as reservoirs specific for these fungi, and these were identified as sources of infection after near-drowning events.<sup>27</sup> However, adjacent agricultural soils were found to be colonized in a greater magnitude than water or sediment, suggesting the former is a main habitat of these fungi.

Subsequent investigations concerning the ecology of *Scedosporium* species confirmed the correlation between their abundance and human impact on environments.<sup>25,28–31</sup> Agricultural areas<sup>30</sup> as well as playgrounds and soils in urban surroundings<sup>25,32</sup> were consistently found to be heav-

ily colonized. *Scedosporium* spp. are described to degrade alkanes,<sup>20,26</sup> and therefore it is not surprising that they are responsible for 10% of the fungi found in leachate from soil remediation.<sup>31</sup> The impact of alkanes and elevated temperature on the soil mycobiota was studied in laboratory models. It was shown that the abundance of *Scedosporium* spp. (mainly *S. apiospermum* and *S. dehoogii*) correlates with diesel fuel concentration and elevated temperatures (10% w/v and 25°C were tested, respectively). The number of *Aspergillus* and *Penicillium* isolates decreased in the same system (Eggertsberger M, unpublished results). In this context it should be mentioned that the temperature in urban soils, that is, in traffic islands can reach more than 30°C even in temperate climates.<sup>33</sup>

The occurrence of *Scedosporium* spp. is also influenced by the pH of the substrate, with an optimum of 6–8. Only few colonies were recovered from acidic (like most of the forest soils) or basic (as French seashores) soils. Another slight but positive correlation was postulated by Kaltseis et al.<sup>25</sup> concerning fungal density and nitrate concentration in soil. In industrially fertilized crop-fields less *Scedosporium* colonies were isolated than in biologically managed fields without mineral fertilizing regimes (Mall B, unpublished results). Concerning nitrogen usage, it should be pointed out that *Scedosporium* spp. can use complement compounds of the innate immune system in liquor as nitrogen source.<sup>34</sup> As an additional ecophysiological

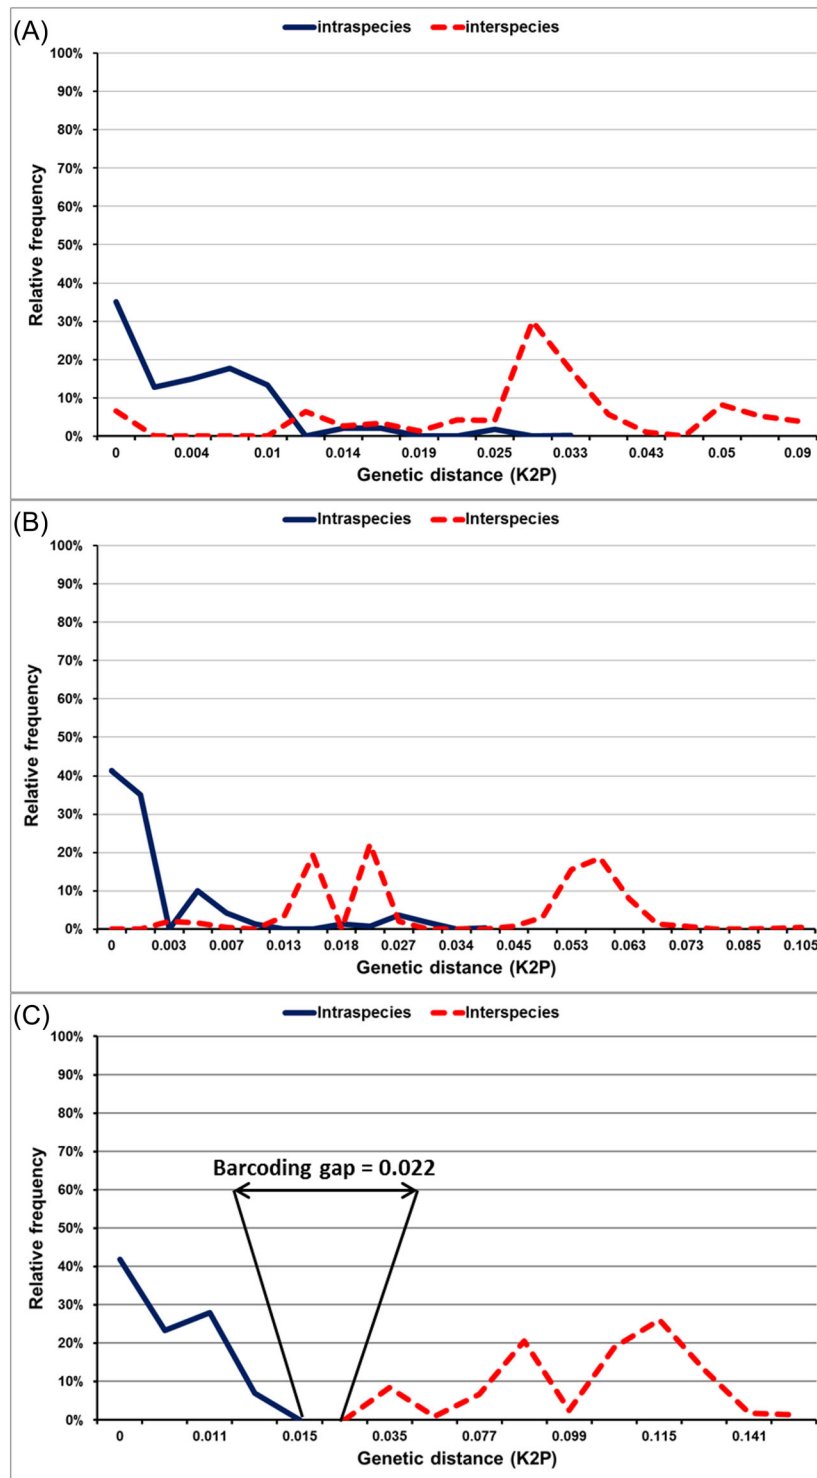

**Figure 3.** Distribution of intra-species (solid line) and inter-species (broken line) pairwise Kimura 2-parameter genetic distances of the ITS region (A) and the  $\beta$ -tubulin gene (*TUB*, exon 5 and 6) (B) within the 10 currently accepted *Scedosporium* species, indicating the lack of a DNA barcoding gap, and the  $\beta$ -tubulin gene (*TUB*, exon 5 and 6) (C) including only *Scedosporium aurantiacum*, *S. cereisporum*, *S. ellipsoideum* and *S. minutisporum*, indicating the presence of a DNA barcoding gap.

**Table 1.** Major epidemiological differences according to major groups of *Scedosporium/Lomentospora* species.

|                           | <i>Lomentospora prolificans</i>                                                                                        | <i>Scedosporium apiospermum</i> species complex (other than <i>Scedosporium aurantiacum</i> )                        | <i>S. aurantiacum</i>                                                                                                |
|---------------------------|------------------------------------------------------------------------------------------------------------------------|----------------------------------------------------------------------------------------------------------------------|----------------------------------------------------------------------------------------------------------------------|
| Geographical distribution | Australia, European regions, particularly Spain, Southern USA                                                          | Worldwide                                                                                                            | Australia, European regions                                                                                          |
| Ecology                   | Soil, decaying matter                                                                                                  | Sewerage, polluted environments of high human activity                                                               | Sewerage, polluted environments of high human activity                                                               |
| Host risk groups          | Largely immunocompromised patients, in particular those with malignancy, and organ and stem cell transplant recipients | Chronic lung disease including cystic fibrosis, bronchiectasis; near drowning; immunocompetent and immunocompromised | Chronic lung disease including cystic fibrosis, bronchiectasis; near drowning; immunocompetent and immunocompromised |
| Case clusters             | Reported                                                                                                               | Reported                                                                                                             | Not defined                                                                                                          |

feature that helps to survive in the human host, the siderophore production of *Scedosporium* spp. in slightly acidic substrates could be of interest.<sup>35</sup> Furthermore, *S. apiospermum*, *S. aurantiacum*, and *L. prolificans* were identified by molecular analyses in mesophilic bagasse composts in 3.8%, but it seems to be unclear whether the identification method excluded *S. boydii*.<sup>36</sup>

Distribution patterns of the *Scedosporium* species show regional differences.<sup>25,28,30</sup> In Australia, *S. aurantiacum* accounted for more than 50% of all environmental isolates studied, whereas *S. apiospermum* and *S. dehoogii* are predominant in Austria and France, respectively. Ecological preferences were observed, for example, in the abundance of *S. dehoogii* in the presence of high levels of human activity.<sup>25,30</sup> For its part, *S. aurantiacum* is characteristic of agricultural areas in the west of France.<sup>30</sup>

### Clinical epidemiology

Species-specific patterns, host risk groups, organ-specific predilection, and *in vitro* antifungal susceptibilities,<sup>8,10,18,37–39</sup> underline that understanding of the epidemiology is essential to clinical management. *Scedosporium apiospermum* and *S. boydii* have a worldwide distribution; by contrast, *L. prolificans* is rarely encountered in environmental samples and appears more commonly in the arid climates of Australia and Spain.<sup>8,9,39,40</sup> More recently, *L. prolificans* has been recognized in other European countries, the USA and Korea.<sup>11,38,41–43</sup> Many *S. aurantiacum* infections have been reported from Australia,<sup>8,39</sup> the Netherlands,<sup>44</sup> and Japan.<sup>45</sup> The epidemiological features between the three main groups of pathogens within *Scedosporium* and *Lomentospora* are summarized in Table 1.

### Immunocompromised hosts

Solid organ transplant (SOT) and hematopoietic stem cell transplant (HSCT) patients account for a large propor-

tion of patients at high risk for invasive *Scedosporium/Lomentospora* infections. However, individuals with cancer and other immunodeficiencies are also at risk for these mycoses. For SOT and HSCT patients, the risk of dissemination varies with the type of transplant and immunosuppressive regimen, degree and duration of neutropenia, environmental exposure, and type of antifungal prophylaxis.<sup>8,38,42,46,47</sup> Comparison of infection incidence in these patients across studies is difficult due to the use of different denominators. In a population-based survey, Heath et al.<sup>8</sup> reported an incidence of 1/100 000 population, of which two-thirds of cases occurred in SOT patients.

Regarding two studies in the USA series, *Scedosporium/Lomentospora* infections accounted for 25% of all non-*Aspergillus* mould infections in transplant recipients (SOT, 29%; HSCT 71%),<sup>38</sup> while in another study of a HSCT cohort a frequency of 1.11 cases/100 000 patient-inpatient days was reported.<sup>48</sup> In the first report, Husain et al.<sup>38</sup> found that disseminated disease occurred more often in HSCT (69%) than in SOT recipients (53%), particularly by *L. prolificans* (39% vs. 17%;  $P = .05$ ), with infections in HSCT recipients having an earlier median onset (1.3 months vs. 4 months,  $P = .007$ ), being more fungaemic (33% vs. 11%,  $P = .04$ ), and strongly related to neutropenia (67% vs. 9%,  $P < .001$ ). Additionally, HSCT recipients were more likely to have received prior antifungal prophylaxis (64% vs. 17%), and those that received antifungal prophylaxis tended to have later onset of *Scedosporium/Lomentospora* infections compared to those who did not (median time to onset, 4 vs. 2.3 months).<sup>38</sup> The earlier occurrence of disease after HSCT, generally during the pre-engraftment period has been noted.<sup>3,49</sup>

According to this, predictors of invasive disease have included HSCT and leukemia, with acute leukemia and *L. prolificans* infection predicting death.<sup>8</sup> Doligalski et al.<sup>50</sup> describe *Scedosporium* infections in 3.5% of the patients after lung transplantation, and the 3-month all-cause mortality was 21.7%. In a single center, 16 out of 27 SOT patients were considered colonized with *Scedosporium*,

colonization being relatively common in lung transplant recipients (73%).<sup>42</sup> Invasive disease occurred in 11 patients (41%) with *L. prolificans* and *S. apiospermum* species complex causing 41% and 55% of cases, respectively. The 6-month mortality was 55%, similar to other studies.<sup>8,38</sup> Over two-thirds of patients who developed *Scedosporium* infections had received immunosuppression with alemtuzumab or anti-thymocyte globulin, which may account for the higher mortality given their profound immunosuppression. Regarding clinical manifestations of *Scedosporium/Lomentospora* infections in SOT and HSCT patients, they may range from sinopulmonary disease and brain abscess to disseminated infection and aneurysms, which are often fatal.<sup>51–54</sup>

Infections caused by *Scedosporium/Lomentospora* uncommonly occur in patients with hematological malignancy,<sup>43,55,56</sup> advanced human immunodeficiency virus (HIV) infection,<sup>57</sup> and primary immunodeficiency disorders.<sup>58,59</sup> These mycoses have attributable mortality of up to 77% in patients with acute leukemia.<sup>55</sup> As with HSCT recipients, patients with hematological malignancy are more likely to be neutropenic at the time of diagnosis of *Scedosporium/Lomentospora* infections and to have disseminated disease.<sup>8,49,56</sup> On the other hand, Tammer et al.<sup>57</sup> reviewed 22 HIV-infected patients with detection of *Scedosporium* species in clinical specimens; invasive scedosporiosis was proven in 54.5% of patients, among them dissemination occurred in 66.7% with a mortality rate of 75%. Patients with invasive scedosporiosis were more likely to have CD4 cell counts <100/ $\mu$ l. Cases of *Scedosporium/Lomentospora* infections in patients with chronic granulomatous disease (CGD) have been described.<sup>58–60</sup> Most of these infections involved the lung or soft tissue although disseminated infection has been reported, with *S. apiospermum* accounting for most of them. Moreover, breakthrough infections have been described in patients who were on long-term antifungal treatment or prophylaxis.<sup>59</sup>

### Non-immunosuppressed hosts

*Scedosporium* species are classically known from traumatic infections, leading to arthritis or eumycetoma, and from pulmonary colonization, often in preformed cavities, eventually leading to allergic bronchopulmonary mycosis.

Colonization of lungs of patients with CF by *Scedosporium/Lomentospora* species is well established and the rate ranges between 0 and 21%,<sup>61–64</sup> being the second most frequent species after *A. fumigatus*.<sup>7</sup> Species prevalence in these patients varies within the region studied: *S. boydii* was the most frequent species (62%) in a French cohort, followed by *S. apiospermum* (24%), *S. aurantiacum* (10%), and *S. minutisporum* (4%).<sup>65</sup> In a study performed in German CF patients, *S. apiospermum* was the most frequent

species (49%) followed by *S. boydii* (29%), *L. prolificans* (12%), *S. aurantiacum* (5%), and *S. minutisporum* (5%).<sup>66</sup> In contrast, *L. prolificans* was the most frequent species isolated in patients with CF in Northern Spain.<sup>67</sup> In Australia, the most frequent species seems to be *S. aurantiacum* followed by *L. prolificans* and *S. apiospermum*.<sup>68</sup> *Scedosporium dehoogii* has rarely been isolated in human infections and to our knowledge never causing colonization in the airways of CF patients.

Numerous cases of *S. apiospermum* eumycetoma have been described in the literature, mostly affecting the lower limbs. These infections are found worldwide including temperate regions. Case reports on eumycetoma from Europe, United States, and Brazil were ascribed to *S. apiospermum/S. boydii*<sup>69–72</sup> but mostly identified with classical methods so that it cannot be ascertained whether *S. aurantiacum* or *S. dehoogii* were involved in any of these cases.

A special category is formed by cerebral infection after near-drowning. The etiologic agents are reportedly members of the *S. apiospermum* complex, but most data were published prior to molecular species distinction. Tintelnot et al.<sup>73</sup> re-identified 11 isolates and showed that most of the isolates belong to *S. apiospermum sensu stricto*, although *S. boydii* and *S. aurantiacum* were also identified.<sup>73,74</sup> Furthermore, *S. aurantiacum* has been reported from a survivor of a tsunami in Japan.<sup>45</sup> To date, *L. prolificans* has not been reported in this clinical context.

## Human pathology

The patients' immune status and fungal portal of entry seem to play an important role in the clinical course of *Scedosporium/Lomentospora* infections. Patients with fully competent immune systems may be asymptotically colonized or locally infected. On the other hand, in patients with trauma involving major vessels, with severe injuries in the vicinity of the CNS, or with immune dysfunction, invasive infections are frequently found.

## Colonization

*Scedosporium* colonization of the airways in patients with CF usually starts during adolescence, becoming chronic in up to 54% of patients having *Scedosporium* positive cultures (unpublished data), with one predominant strain that can be identified over several years.<sup>67,75,76</sup> Bronchial colonization may lead to chronic inflammation or even to life-threatening invasive disease in cases of severe immunosuppression, such as lung transplant or hematological malignancies.<sup>3,5,77,78</sup>

Of interest, *Scedosporium* conidia are rarely found in the air<sup>79</sup> so that the exact mechanism leading to airway

colonization remains to be ascertained. Moreover, the presence of *Scedosporium/Lomentospora* in respiratory secretions of patients suffering from non-CF bronchiectasis is scant and tends to be associated with preexisting cavities, leading to eumycetomas and pulmonary fungus balls.<sup>78</sup> ABPA and mucoid *Pseudomonas aeruginosa* colonization are positively correlated with *Scedosporium/Lomentospora* colonization.<sup>80</sup> In this sense, it is worth highlighting that a recent study has shown that *P. aeruginosa* is able to inhibit *S. aurantiacum* and *L. prolificans* growth, with this inhibition being associated but not limited to the non-mucoid phenotype of the bacterium.<sup>81</sup>

Revealing the epidemiology of human colonization by *Scedosporium/Lomentospora* is further hampered by the fact that they are slow growing moulds. Molecular strategies of detection have been proposed,<sup>82,83</sup> revealing rates of colonization higher than those assessed by culture. Unfortunately, there are no molecular techniques commercially available for this purpose, making the general implementation of this approach into the clinical laboratories difficult.

### Allergic bronchopulmonary mycoses

*Scedosporium*, but not *Lomentospora*, has been linked to clinical cases of allergic bronchopulmonary mycoses (ABPM),<sup>7</sup> with 3% of the ABPM cases reported in the literature being related to *Scedosporium* species. While it is not clear to what extent colonization drives long-term decline of pulmonary function, cases of *Scedosporium*-related ABPM have been linked to a clear respiratory deterioration of patients.<sup>84</sup> The clinical picture of ABPM caused by non-*Aspergillus* species tends to differ from classical allergic bronchopulmonary aspergillosis (ABPA), with asthma being less frequent and with higher immunoglobulin E (IgE) levels. Promising serological methods aimed at the specific detection of antibodies against *Scedosporium* are under development<sup>85</sup> but still not available.

### Localized infections

Localized infections by *Scedosporium/Lomentospora* species include different organs and clinical manifestations: (1) cutaneous infections; (2) eumycetoma; (3) muscle, joint and bone infections; and (4) ocular infections.

#### Cutaneous infections

Skin manifestations may be the initial presentation of a subcutaneous scedosporiosis after traumatic inoculation, or a sign of hematogenous dissemination (Fig. 4A). They can mimic those caused by other fungi, such as species of *Aspergillus* or *Fusarium* with ecchymosis, necrotic papules, and hemorrhagic bullae, but they may also present solitary

ulcers, infiltrative erythematous plaques and nodules, or suppurative nodules and ulcers. Both *S. apiospermum* and *L. prolificans* have been reported to cause soft tissue infections in immunocompromised hosts, including patients receiving chronic steroid therapy for chronic obstructive pulmonary disease or receiving immunosuppressive therapy for rheumatoid arthritis.<sup>3,86,87</sup>

#### Eumycetoma

This is a chronic progressive granulomatous infection of the subcutaneous tissue. It may affect muscles, bones, cartilage, and joints, most often involving the lower extremities, usually the foot. Like other subcutaneous mycoses, the fungi enter through a penetrating trauma. The lesion is painless and grows slowly with well-defined margins, remaining localized for long periods. Multiple nodules can appear and spontaneously drain purulent material mixed with soft, <2 mm size, and white to yellowish, grains resembling fig seeds. Interconnected sinus tracts are usually present by the end of the first year and may close and heal completely, while new ones may open. Involvement of ligaments, joint cartilage, and even bone may occur with time. Eumycetoma can produce profound disability and deformity but constitutional symptoms rarely appear. Clinically and radiologically, eumycetomata caused by *S. apiospermum* species complex or *L. prolificans* are similar to those caused by other fungi.<sup>3,71</sup>

#### Muscle, joint, and bone infections

Wound infections, arthritis, and osteomyelitis usually occur when anatomic barriers are ruptured by trauma or surgery. Osteomyelitis is described in lung transplanted recipients<sup>88,89</sup> as a severe complication of immunosuppression. Joint or bone infection by *S. apiospermum* or *L. prolificans* results in acute septic arthritis and acute or subacute osteomyelitis, respectively. Plain radiography may be normal in earlier stages, but magnetic resonance imaging helps to confirm clinical diagnosis. However, the etiological organism cannot be identified without culture or molecular detection from articular fluid or a bone biopsy.<sup>3,90</sup>

#### Ocular infections

*Scedosporium* species can cause keratitis among immunocompetent hosts and usually following a corneal trauma. Clinical presentation resembles other types of keratitis (local pain, photophobia, decrease visual acuity, lacrimation) and the cornea examination reveals gray to white lesions with irregular margins and elevated borders, ring infiltrate, hypopyon and keratic precipitates. Endophthalmitis in immunocompetent individuals may be caused by *S. apiospermum*. *S. boydii* or *L. prolificans* are secondary to surgery, traumatic inoculation, intravenous drug addiction, and



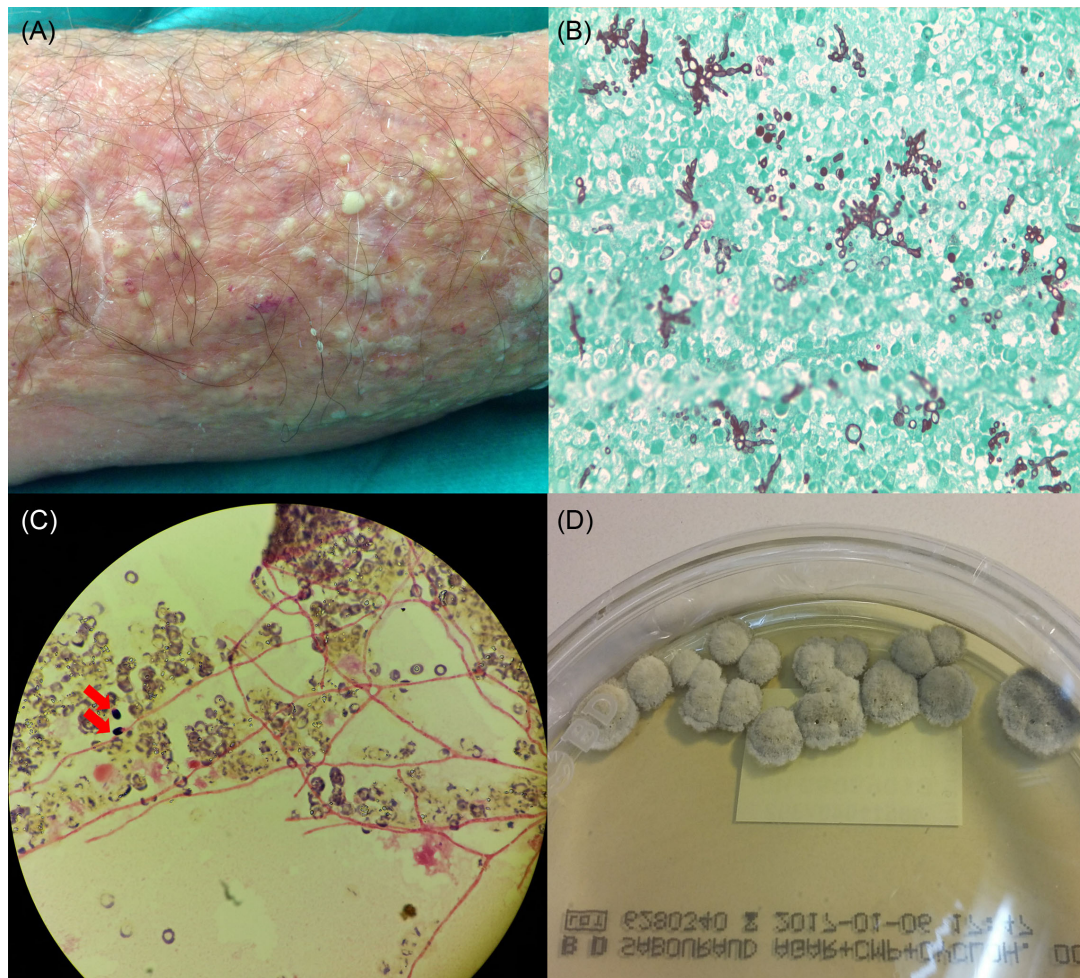

**Figure 4.** (A) Disseminated subcutaneous scedosporiosis manifesting as cellulitis in a kidney transplant recipient. Courtesy of Dr. Oscar Len (Vall d'Hebron Hospital, Barcelona, Spain). (B) Grocott-Gomori staining of brain section showing abundant irregular hyphae from a case of invasive scedosporiosis. (C) Gramstaining of positive blood culture showing septated hyphae and adventitious conidia from a patient with disseminated scedosporiosis. (D) Pure culture of *Scedosporium apiospermum* complex isolated from a wound infection in a lung transplant patient.

contiguous spread from an adjacent site. However, in immunocompromised patients, endophthalmitis is usually part of disease dissemination, secondary to parenteral nutrition or chemotherapy. Endophthalmitis curses with ocular pain, photophobia, and blurred vision, these symptoms not being specific for scedosporiosis. Fundoscopic examination shows creamy-white, well-circumscribed lesions of the choroids and retina, vitreous infiltrates and hypopyon.<sup>3,91,92</sup>

### Disseminated Infections

*Scedosporium/Lomentospora* disseminated infection (SDI) usually takes place in severely immunocompromised hosts, such as patients with cancer and hematological malignancies, hematopoietic stem cells or solid organ transplant recipients, patients with immunodeficiency, and those receiving immunosuppressive therapy.<sup>3,5,50,93–95</sup> It happens

following hematogenous spread from lungs, skin, or any source of localized infection. Recently, a disseminated infection in three patients after transplantation of a nearly-drowned donor has been reported.<sup>96</sup> As well as in other invasive fungal infections, SDI may result in a wide spectrum of syndromes, depending on the primary focus, patient's immune status, and time of evolution of the disease.

### Central nervous system (CNS) infections

This is a severe manifestation of disseminated infection (Fig. 4B). In the literature, neurotropism of *Scedosporium/Lomentospora* is often mentioned. In immunocompromised patients, CNS infection may appear as a manifestation of systemic disease in the absence of a clear spreading focus,<sup>38,51</sup> while in immunocompetent hosts it mostly results from a near-drowning episode with aspiration of conidia from contaminated water and further hematogenous dissemination from lungs.<sup>97,98</sup> CNS infection has been

occasionally reported following trauma and iatrogenic procedures, and after contiguous spread from infected paranasal sinuses.<sup>99,100</sup> Clinical manifestations include single or multiple brain abscesses, meningitis and ventriculitis.<sup>98,99</sup>

#### *Endocarditis and other intravascular infections*

These uncommon manifestations of disseminated *Scedosporium* infections are associated with high mortality rates. Mycotic aneurysms, especially those involving the aorta and vertebrobasilar circulatory system, have been described in both immunocompromised and immunocompetent hosts.<sup>53</sup> Endocarditis evolves in severely immunocompromised patients and in those enduring risk factors, such as a valve replacement or an intravascular or intracavitary device insertion.<sup>92</sup> Twelve cases of *L. prolificans* endocarditis were reported in the literature.<sup>101,102</sup> Most patients were immunocompromised and developed left-side infections with large vegetations and systemic embolism. *S. apiospermum* complex endocarditis has been frequently associated with cardioverter-defibrillators or pacemaker insertion. In this setting, patients often tend to suffer from right-side endocarditis and large artery thromboembolism.<sup>103,104</sup>

#### *Systemic infection*

This is the most catastrophic expression of disseminated infection (Fig. 4C), fostered by the ability of *Scedosporium* species to invade blood vessels and to sporulate in tissue. In patients with acute leukemia or with allogeneic hematopoietic stem cell transplant *Scedosporium* produces fatal massive infections in the context of aplasia or severe neutropenia. Many reports of systemic infection due to *L. prolificans* in this group of patients have been published, with a higher incidence in Australia and Spain,<sup>105,106</sup> and nosocomial outbreaks during hospital reconstruction have been also reported.<sup>56,107</sup> Clinical features include fever, dyspnea, lung infiltrates, signs and symptoms of meningoencephalitis, skin lesions and other manifestations resulting from multiple organ involvement. In this setting, *L. prolificans* and *S. apiospermum* complex are isolated from blood cultures in a high percentage of patients.<sup>9,11,38,48,106</sup> In solid organ transplant recipients, systemic infection is favored by immunosuppression in the setting of graft versus host disease<sup>51</sup> and previous colonization by *Scedosporium*.<sup>52,108</sup> Other risk groups for developing disseminated infection with multiple organ involvement are HIV patients with CD4 < 50/ $\mu$ l<sup>57</sup> and those receiving immunosuppressive therapy.<sup>109</sup>

### **Host-pathogen interactions: immune response and fungal virulence factors**

The host immune response is a complex network of cellular and molecular mechanisms that can determine patient

survival but, on the other hand, fungal cells have also developed strategies to evade immune responses and to overcome stressful conditions encountered inside the host<sup>110</sup> (see Fig. 5).

#### **Host immune response**

As the infectious propagules of *Scedosporium/Lomentospora* species are able to invade the host through a range of different sites (including: airways, puncture wounds, etc.), the immune responses also vary, with different immune cells and pathways being challenged to clear them.<sup>3</sup> Thus, general barriers as epithelia with the mucociliary system, tissue-resident immune cells, and the secretion of defense molecules play essential roles in the immune response to these infections.<sup>111,112</sup> In these first stages of fungal invasion, recognition of fungal cells is mediated by pattern recognition receptors (PRRs),<sup>113,114</sup> but only dectin-1 and TLRs have been studied and proved to be determinant in the recognition of *Scedosporium* cells.<sup>115–117</sup> Although there are structural and compositional differences among species of the *S. apiospermum* complex, peptidorhamnomannans, rhamnmannans, and  $\alpha$ -glucans from the fungal cell wall seem to be relevant pathogen associated molecular patterns.<sup>116,118–120</sup>

After recognition by PRRs, phagocytes, including macrophages, neutrophils, and dendritic cells (DC),<sup>121</sup> and other cells with phagocytic capacity promote fungal death, growth delay or inhibition and recruit polymorphonuclear leukocytes (PMNs) by synthesis of pro-inflammatory cytokines.<sup>122,123</sup> Conidia of *L. prolificans* seem to be phagocytized in a manner comparable to *Aspergillus*, at least by monocyte-derived macrophages,<sup>124</sup> despite the larger size of its conidia.<sup>105</sup> In contrast, germination of *L. prolificans* conidia is inhibited less efficiently than that of *A. fumigatus* conidia.<sup>124</sup>

Although the cytokines locally expressed during *Scedosporium* infection have been poorly studied, interferon  $\gamma$  (IFN- $\gamma$ ) and GM-CSF have been described to enhance the activity of phagocytes against *Scedosporium* species.<sup>125–127</sup> It is also known that interleukin (IL) 15 increases IL-8 release from PMNs and enhances PMN-induced hyphal damage and oxidative burst against *L. prolificans*.<sup>128</sup> Additionally, compared to *Aspergillus* species, *L. prolificans* has been shown *in vitro* to induce higher synthesis of tumor necrosis factor  $\alpha$  (TNF- $\alpha$ ) and IL-6 by human monocytes,<sup>129</sup> in relation with differences in the cell wall composition. In general, these cytokines are important to resist invasive infections by promoting respiratory burst and monocyte and neutrophil migration.<sup>130,131</sup> Some cytokines thus have an immunomodulatory function against *Scedosporium*

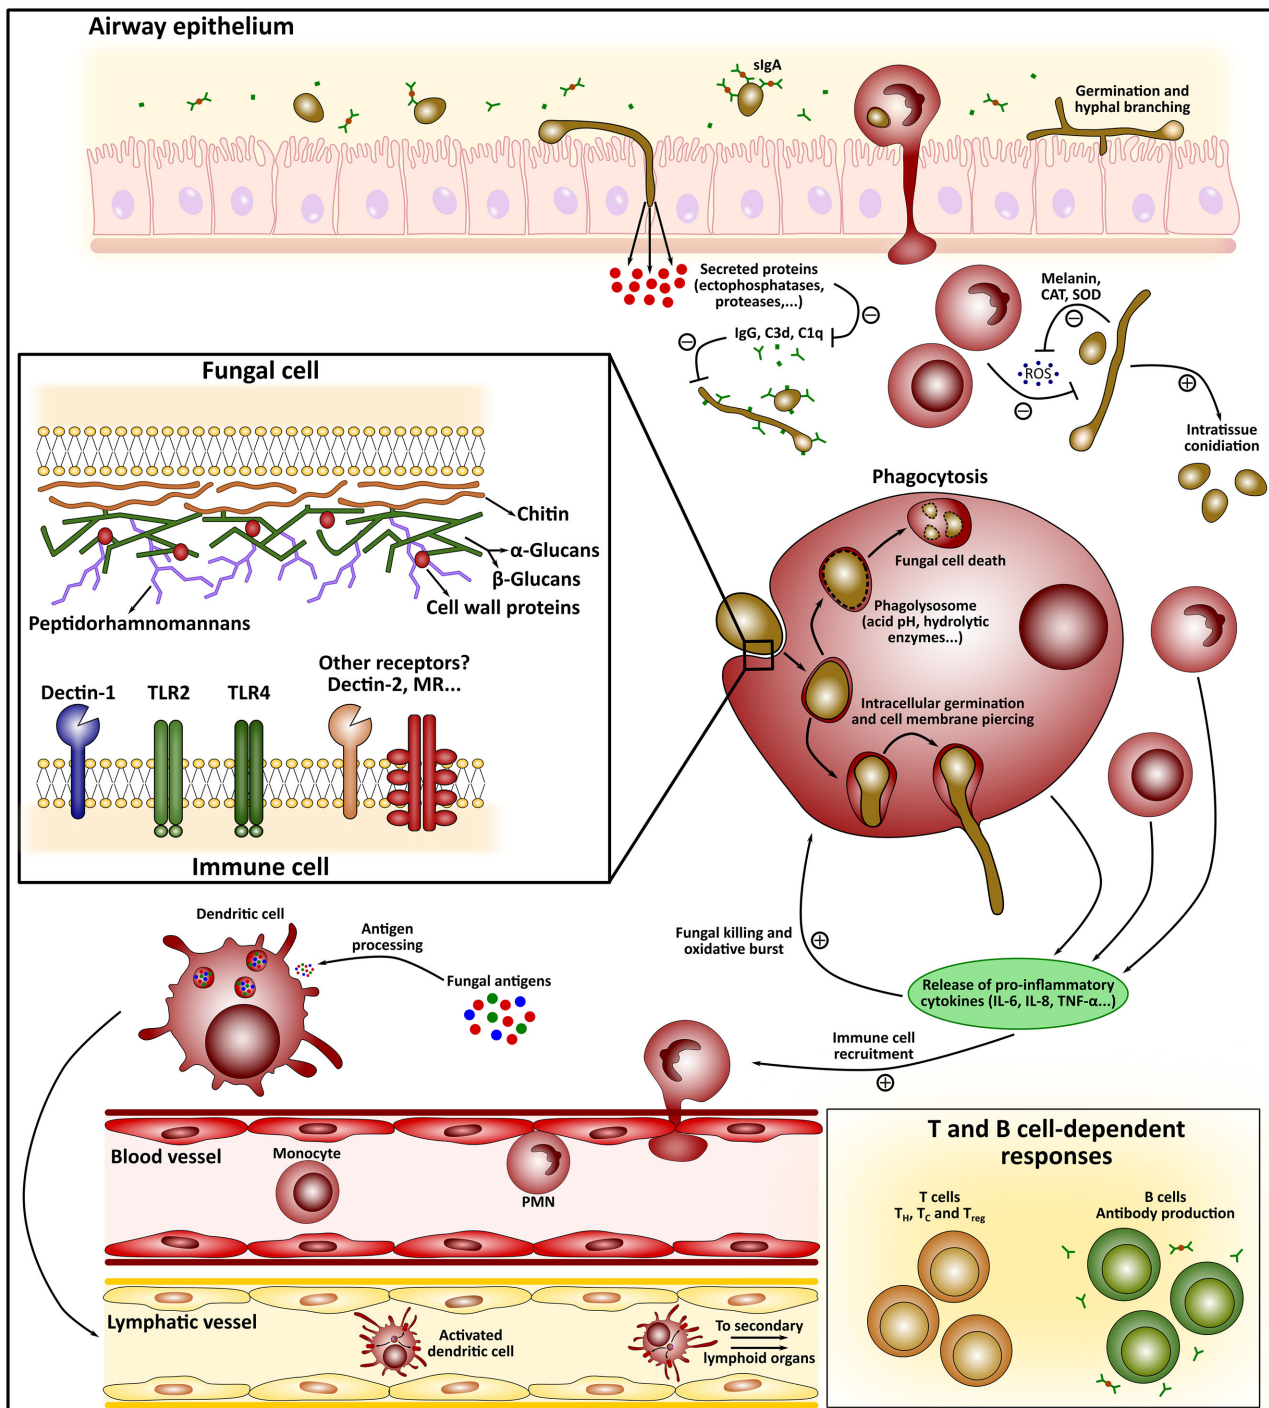

Figure 5. General scheme of immunity against *Scedosporium/Lomentospora*.

species. This, together with susceptibility of *Scedosporium/Lomentospora* species to phagocytosis,<sup>124,132,133</sup> may explain their low incidence in the immunocompetent population. In case ingested *Scedosporium/Lomentospora* conidia achieve germination and growth out of the alveolar macrophages, neutrophils and circulating monocytes attracted to the infection site become essential.<sup>124</sup> Although primary macrophages are able to damage hyphae, the major

part of this role falls upon neutrophils via degranulation, release of large amounts of reactive oxygen species (ROS), and formation of neutrophil extracellular traps (NET), which trap fungal cells in a matrix mainly composed by DNA and proteins with antimicrobial activity.<sup>121,124,132,133</sup>

Antigen-presenting cells, mainly DCs, internalize and present potential antigens to T cells, which differentiate into T helper ( $T_H$ ), T cytotoxic ( $T_C$ ), or regulatory T cells

( $T_{reg}$ ), depending on the stimulus and PRR involved.<sup>114</sup> In this way, “innate” is connected with “adaptive” or long-term immunity in which mainly  $T_H1$ ,  $T_H2$ , and  $T_H17$  cells<sup>114,134,135</sup> conform the best known antifungal response, but little is known about their specific role against *Scedosporium/Lomentospora* species. On the other hand, B cells are usually activated through  $T_H$  cells to produce antibodies whose role in immunity has long time remained unclear.<sup>136</sup> Many antigenic proteins have been recently identified in *S. boydii*<sup>85,137</sup> and *L. prolificans*,<sup>138–140</sup> and some of the antibodies recognizing them might be protective.<sup>141</sup> Interestingly, *L. prolificans* conidia are more strongly recognized by salivary immunoglobulin A (IgA) than hyphae, while sera recognize both forms similarly. This observation is consistent with a fungal airway invasion in which conidia rather than hyphae are inhaled by the host.

### Virulence factors

The ability of *Scedosporium/Lomentospora* species to germinate is remarkable, which in the case of *S. boydii* has been described to be enhanced by contact with human cells.<sup>142</sup> *L. prolificans* is capable of conidiation in host tissue, which promotes dissemination and explains the rapid progression of the disease.<sup>143</sup>

Among the specific molecules, some peptidopolysaccharides are immunologically active, able to regulate pathogenesis and host immune response.<sup>144</sup> Of these, peptidorhamnomannan (PRM), which is expressed on both conidia and hyphal cell walls and has been related to fungal adhesion and endocytosis by epithelial cells and macrophages, deserves special attention.<sup>142,145–147</sup> PRM may facilitate colonization, virulence, and dissemination by the fungus as consequence of an exacerbation of the infection process that reduces the inflammatory response.<sup>148</sup> Moreover, PRM is recognized by antibodies, which is useful for development of diagnostics.<sup>149</sup> *S. boydii*-derived rhamnomannans require TLR-4 signaling for cytokine release by macrophages, as well as MAPKs phosphorylation and  $\kappa B\alpha$  degradation.<sup>120</sup>

Glucans have widely been reported as ligands for TLRs and activators of the immune response. *S. boydii* surface  $\alpha$ -glucan, a glycogen-like polysaccharide consisting of linear 4-linked  $\alpha$ -D-Glcp residues substituted at position 6 with  $\alpha$ -D-Glcp branches, is essential to phagocytosis of conidia and induces cytokine secretion by cells of the innate immune system involving TLR2, CD14, and MyD88.<sup>116</sup>  $\beta$ -glucans are used as a diagnostic strategy for several fungal infections, but *Scedosporium* species release low levels of this polysaccharide.<sup>150</sup>

Glucosylceramides (GlcCer) or CMHs are the main neutral glycosphingolipids expressed by almost all fun-

gal species studied so far, including species of the *S. apiospermum* species complex.<sup>151,152</sup> These molecules are associated with fungal growth and differentiation and consequently play a role in the infectivity of fungal cells.<sup>153–155</sup> Structural differences between fungal and mammalian (or plant) CMHs make these molecules potential targets for the development of new antifungal drugs, to be used alone or in conjunction with conventional antifungals.<sup>156</sup>

Host invasion-related enzymes are further virulence factors of strategic relevance for *Scedosporium* species.<sup>144</sup> Among these are proteolytic enzymes, which are key components to invade tissues, eliminate defense mechanisms and assist in nutrient acquisition. A serine protease able to degrade fibrinogen was described in *S. apiospermum*, which might act as mediator of severe chronic inflammation in patients suffering from cystic fibrosis.<sup>157</sup> Moreover, some metalloproteases with ability to hydrolyze different substrates as IgG, laminin, fibronectin, or mucin have been described in *S. boydii* and *S. apiospermum*.<sup>158–160</sup> *Scedosporium* species are also able to degrade complement system compounds of the innate immune system.<sup>34</sup>

Acid and alkaline ecto-phosphatase activities were also in mycelia of *S. boydii*.<sup>161</sup> In *Candida* spp. these have been related to adhesion and endocytosis,<sup>162,163</sup> but limited information is available on their relevance to pathogenesis in *Scedosporium*. Enzymes such as Cu/Zn cytosolic superoxide dismutase<sup>164</sup> and a monofunctional catalase<sup>165</sup> from *S. boydii* have been described to be important for evasion of the fungus to the host immune response, the latter being also useful for diagnostic purposes.<sup>85</sup> Two siderophores, dimeric acid and *N*( $\alpha$ )-methyl coprogen B, were identified in *S. boydii* and the latter was used as a marker of the airway colonization by this species.<sup>35,166</sup>

The pigment melanin might contribute to virulence since it is a general protective component UV radiation and other kind of environmental stress. *Lomentospora prolificans* and *S. boydii* produce melanin through the dihydroxynaphthalene (DHN) biosynthetic pathway.<sup>167,168</sup> While melanin plays a protective role in the survival of the opportunist to oxidative killing, it does not contribute to resistance to amphotericin B.<sup>169</sup>

### Diagnostics

Timely recognition of *Scedosporium/Lomentospora* infections remains challenging, particularly in patients with CF where airway infections still are a major cause of mortality.<sup>170–172</sup> Distinction of colonization from infection can be crucial for adequate patient management. The definition of pulmonary infection in CF includes the following criteria: (1) increased sputum production, (2) repeated isolation of the same species from sputum or BAL ( $\geq 2x$  in 6 months),

(3) pulmonary infiltrate(s) on chest CT-scan or X-ray, (4) treatment failure with antibiotic therapy, (5) unclear lung function decline, (6) exclusion of new/other bacteria (e.g., nontuberculous mycobacteria), and (7) exclusion of ABPA.

Diagnosis classically relies on the detection of fungi from clinical samples by direct microscopic examination of the clinical specimen, or histological analysis, and culture on appropriate culture media (Fig. 4B–D). Histopathological examination of biopsies can be performed to diagnose these mycoses, for example, using KOH treatment. Unfortunately, it is difficult to distinguish *Scedosporium/Lomentospora*-infected tissues from those infected by *Aspergillus* or *Fusarium*, as all of them present hyaline hyphae (excluding *L. prolificans* that may exhibit highly melanised hyphae), regular hyphal septation, and dichotomous branching. However, several unique features may help pathologists to diagnose *Scedosporium/Lomentospora* mycoses, such as irregular branching patterns or intravascular and intratissue conidiation<sup>3,173</sup>

For isolation, semi-selective culture media are useful for the detection of *Scedosporium* and *Lomentospora* amidst competing and more rapidly growing microbes, particularly *A. fumigatus*. Sce-Sel+ media, containing dichloran and benomyl,<sup>174</sup> greatly facilitate recovery of *Scedosporium* species (N.B. benomyl inhibits growth of *L. prolificans*) from polymicrobial clinical samples.<sup>68,175,176</sup> Direct detection and identification from clinical samples by molecular-based techniques may also constitute a valuable alternative. In this way, a species-specific multiplex PCR assay has been developed to detect the clinically most important *Scedosporium/Lomentospora* species from respiratory secretions.<sup>177</sup>

Morphologically and physiologically *L. prolificans* is easily differentiated from *Scedosporium* species based on its susceptibility to cycloheximide, the black color of its colonies, and its characteristic flask-shaped and annellated conidiogenous cells. However, species distinction within the *S. apiospermum* species complex is often impossible. Growth characteristics and utilization of carbohydrates or enzymatic activities, assist in main species differentiation but are inadequate for separation of lineages within the *S. apiospermum* complex, as demonstrated using the Taxa Profile Micronaut™ (Merlin Diagnostika GmbH, Germany) system, which analyzes 570 physiological reactions.<sup>178</sup> In *S. aurantiacum*, Biolog Phenotype analysis using GEN III MicroPlate™ (Biolog Inc., Hayward, CA, USA) containing 94 assorted substrates, reveals metabolic differences between high and low virulence strains, suggesting a link between virulence and ability to utilize D-turanose.<sup>179</sup>

Nucleotide sequence-based analysis is the current gold standard for fungal identification.<sup>17</sup> rDNA ITS sequencing appropriately identifies the main species in *Scedosporium/Lomentospora*,<sup>180</sup> but the partial  $\beta$ -tubulin gene

(*BT2*) is needed to differentiate closely related species. Of note, the status of some species like *S. ellipsoidea*, which is very close to *S. boydii* is still debated (see above).<sup>2</sup> Likewise, reversed line blot hybridization has been successfully applied in sputum samples from patients with CF.<sup>82</sup> Multi-locus sequence typing (MLST) was used to analyze isolates from patients with CF, with three MLST schemes for *S. apiospermum*, *S. boydii*, and *S. aurantiacum* are now online at <http://mlst.mycologylab.org>.<sup>76</sup> Recently the analysis of some repetitive DNA sequences using the semi-automated Diversilab™ system from bioMérieux allowed the identification and genotyping within pathogenic *Scedosporium* species.<sup>181</sup>

Matrix-laser desorption/ionization mass spectrometry (MALDI-TOF/MS) has become available for the first-line identification. It is more economical and its identification accuracy is comparable to that of DNA sequencing.<sup>182–185</sup> The quality of the reference spectra is decisive for reliable identification (Fig. 6A). The current commercially available MALDI-TOF/MS identification solutions are inadequate for *Scedosporium/Lomentospora* and it would be necessary the development of an online reference MALDI-TOF mass spectra library database, specialized in fungal identification, and curated by expert mycologists.

Among the novel assays is PCR-ElectroSpray Ionization-Time of Flight/Mass Spectrometry (ESI-TOF/MS), which involves 16 singleplex polymerase chain reaction (PCR) assays using broad-range primers targeting nuclear or mitochondrial genes, and T2 magnetic resonance (T2MR). PCR-ESI-TOF/MS allows rapid determination of molecular weight and base composition in the amplicons after electrospray ionization and chromatographic separation, and resulting profiles are compared with a database provided by the manufacturer.<sup>186–188</sup> This technique has been used to determine the distribution of fungal communities directly from bronchoalveolar lavage fluid specimens.<sup>189</sup> T2MR technology rapidly and accurately detects the presence of molecular targets within a sample without the need for purification or extraction,<sup>190,191</sup> but designing primers is challenging.<sup>192</sup>

Specific monoclonal antibodies (MAbs) have been developed allowing for species distinction.<sup>167,193</sup> Two MAbs targeting respectively an immunodominant carbohydrate epitope on an extracellular 120-kDa antigen present in the spore and hyphal cell walls of *S. apiospermum* and *S. boydii* or the tetrahydroxynaphthalene reductase of the dihydroxynaphthalene-melanin pathway in *L. prolificans*, may be used in immunofluorescence assay to differentiate these fungi from other septate fungal pathogens on histological sections.

Recently some *Scedosporium* proteins, including a monofunctional cytosolic catalase, proved to be interesting

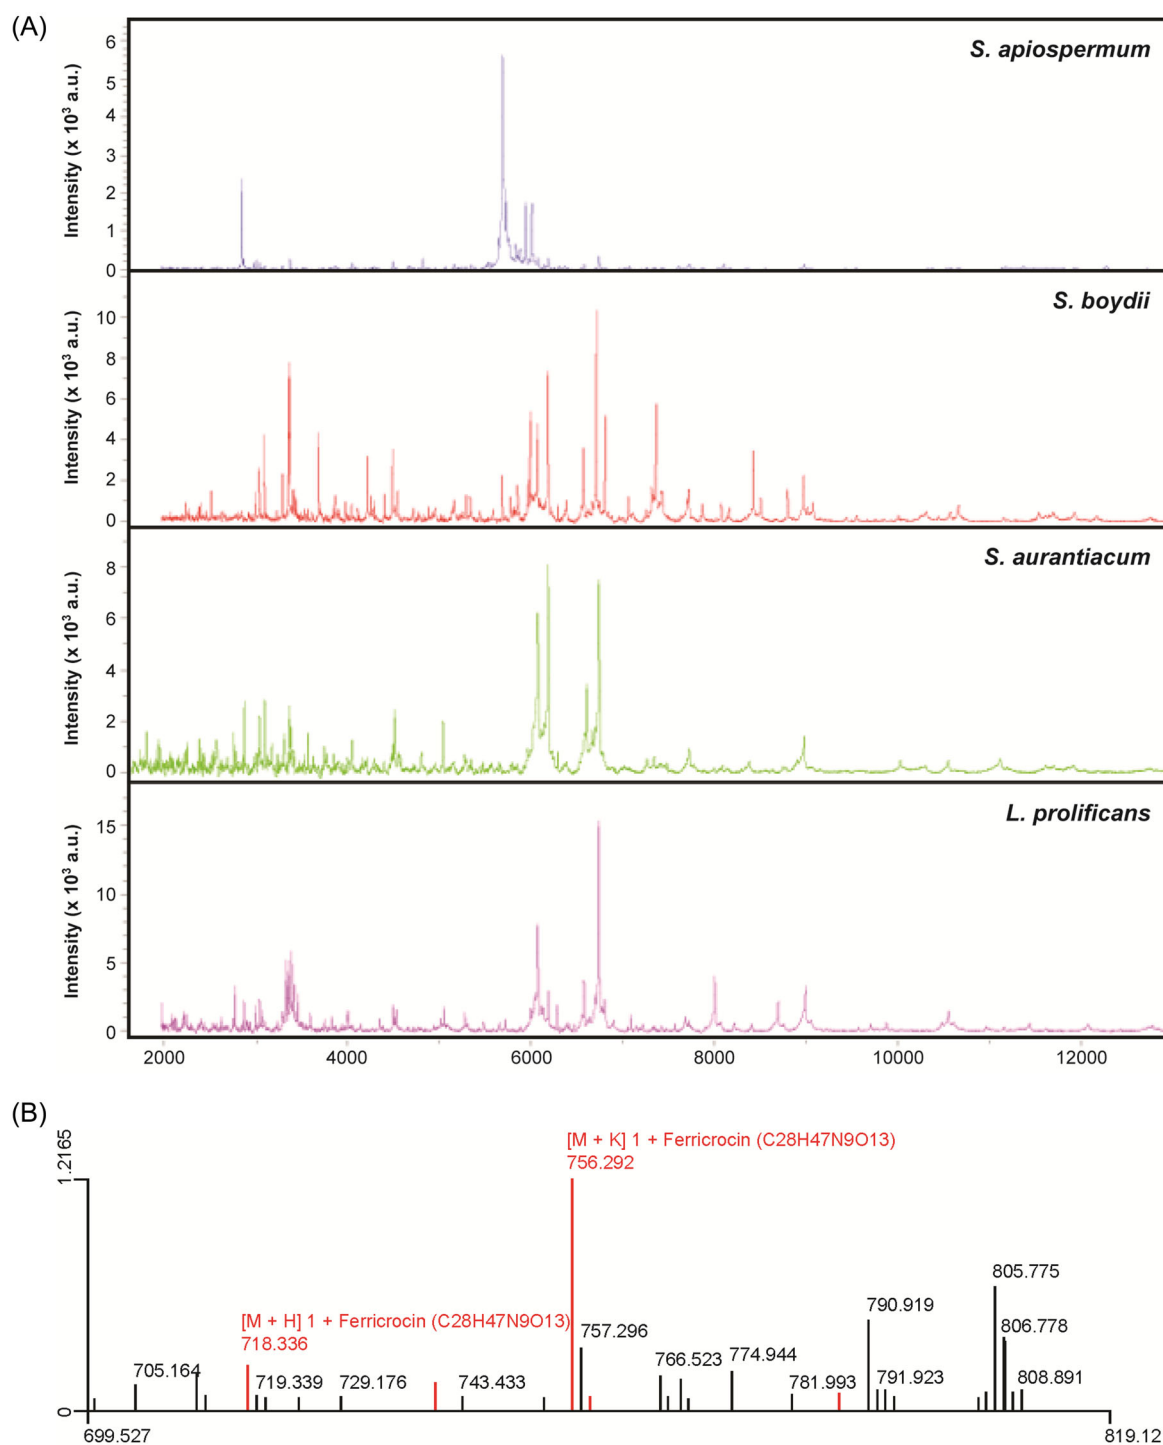

**Figure 6.** (A) Reference spectra for *Scedosporium apiospermum*, *S. boydii*, *S. aurantiacum* and *Lomentospora prolificans* identification by matrix-laser desorption/ionization mass spectrometry (MALDI-TOF/MS). (B) Example of matrix-assisted laser desorption/ionization with Fourier transform ion cyclotron resonance (MALDI-FTICR) mass spectrum annotation. Ferricrocin-like molecules (C<sub>28</sub>H<sub>47</sub>N<sub>9</sub>O<sub>13</sub>) were observed in protonated, sodiated, or potassiumated forms represented by signals at *m/z* 718.3358, 740.3184 and 756.2921, respectively. This intracellular siderophore was annotated in a sample of *S. boydii* (IHEM 15155) and was released from intact fungal spores by microwave-enhanced extraction to methanol. Note that all compounds annotated by Cyclobranch in red were tentatively assigned according to library accurate mass matching with 1 ppm accuracy.

markers of a *Scedosporium* infection, and works are currently being performed in order to develop standardized serological tests.<sup>85</sup>

In addition to proteomic approaches with MALDI-TOF or LC-MS/MS identification of *Scedosporium/Lomentospora* ribosomal equipment,<sup>139,182</sup> mass spectrometry can be used in metabolomics to gain access to specific low-molecular weight biomarkers. Melanin and its degradation products represent the first target in *L. prolificans*. Diverse lipids were also detected on intact spores of *L. prolificans* and *S. apiospermum*.<sup>194</sup> The metabolite AS-183 was detected in fermentation broth of *Scedosporium* spp. SPC-15549.<sup>195</sup>

Siderophores have gained attention as disease biomarkers as well as virulence factors.<sup>196,197</sup> Two siderophore representatives have been rigorously described in *Scedosporium* genus, dimeric acid and *N*( $\alpha$ )-methyl coprogen B,<sup>35</sup> the former possibly being a degradation product of the latter. Siderophores may occur in various ionic forms in mass spectra. Generally, they are observed as ferri- or desferri-forms, but combinations with sodium or potassium ions are possible depending on the sample type.<sup>197</sup> For example, in host tissue the generation of  $[M+Na]^+$ ,  $[M+K]^+$ ,  $[M+Fe-2H]^+$ , or  $[M+Fe+Na-3H]^+$  ions is quite common. Recently a new dereplication tool called Cyclobranch has been developed for the rediscovery of above described compounds.<sup>198</sup> It is based on an integrated library of hundreds of microbial siderophores and secondary metabolites including toxins and nonribosomal peptides. Dereplication (the process of classifying already known compounds) can be performed on conventional mass spectra generated by any ionization technique as well as on liquid chromatography/mass spectrometry or imaging mass spectrometry datasets. These data formats are batch-processed and incorporation of important biometals (including iron) can be supported in calculations and data presentations. An example of a siderophore annotated in a sample of *S. boydii* by matrix-assisted laser desorption/ionization with Fourier transform ion cyclotron resonance (MALDI-FTICR) mass spectrum is illustrated in Figure 6B. It is worth mentioning that Cyclobranch is a free tool (available at <http://ms.biomed.cas.cz/cyclobranch/>) dedicated to exact mass data. In addition to dereplication, the *de novo* sequencing of new microbial structures is also possible. The calculator works with approximately 520 nonisobaric building blocks arising from ribosomal, nonribosomal or polyketide syntheses making the characterization of new siderophores<sup>198</sup> or cyclic, branched, or branched cyclic peptides<sup>199</sup> feasible.

## Therapeutic strategies

Treatment of deep-seated *Scedosporium* or *Lomentospora* infections still remains challenging because of the limited

susceptibility of these fungi to all current antifungal drugs. *Scedosporium* species are resistant to 5-flucytosine and amphotericin B, as well as to the first generation triazole drugs, fluconazole and itraconazole. In addition, they have a reduced susceptibility to echinocandins, particularly caspofungin and anidulafungin, and exhibit resistance to the most recent triazole drug, isavuconazole, *S. aurantiacum* being the least susceptible to antifungal drugs.<sup>12,66,200</sup> Likewise, *L. prolificans* is a pan-antifungal resistant species.<sup>3,12,201</sup> In this connection, it is also relevant to highlight that the available antifungal spectrum is quite limited, and as such more efforts need to focus on the development of novel effective drugs.<sup>202,203</sup>

For treatment of *Scedosporium/Lomentospora* infections, the European guidelines recommend voriconazole as first-line treatment<sup>200</sup> together with surgical debridement when possible. Although favorable results have been observed following such recommendations, the outcome remains poor with mortality rates of >65% and nearly 100% when CNS affection or dissemination occurs.<sup>204,205</sup> A minimum inhibitory concentration (MIC) of less than 2  $\mu$ g/ml could be predictive of a favorable outcome for *Scedosporium* species.<sup>206</sup> Despite the differences on *in vitro* susceptibility among genera, the outcome remains similar especially when dissemination occurs. For this reason, it is of crucial interest to find therapeutic alternatives for these challenging and difficult-to-treat infections.

Antifungal combination therapy has emerged as a promising strategy since therapeutic effect can be achieved at lower concentrations and thus reducing toxic side effects, improving safety and tolerability, shortening the therapeutic effect and preventing treatment failure when antimicrobial resistance is suspected. Few studies have evaluated the *in vitro* activity of double combinations against *Scedosporium* spp. and *L. prolificans*. Among them, combined voriconazole and amphotericin B or echinocandins have shown synergistic effects against both *S. apiospermum* and *L. prolificans*,<sup>207–209</sup> as well as terbinafine plus itraconazole, miconazole or voriconazole against *L. prolificans*.<sup>3,210,211</sup> However, the combination of voriconazole plus terbinafine or liposomal amphotericin B has demonstrated variable outcome in the treatment of these infections.<sup>212–221</sup> Limited data are available on combinations of more than two antifungals. Two triple combinations (amphotericin B plus voriconazole plus anidulafungin or micafungin) have been tested against *L. prolificans* and showed synergy<sup>222,223</sup>.

The *in vitro* activity of combinations of antifungals with miltefosine, antipsychotic drugs or cysteine derivatives is being investigated as a potential treatment alternative.<sup>224–226</sup> It is also highlighting the capacity of inhibitors of Heat shock proteins, calcineurin and deacetylases against fungal species.<sup>227–233</sup> However, their effect

on *Scedosporium/Lomentospora* species should be further researched.

Murine studies have also shown promising results for combinations of antifungals with granulocyte-colony stimulating factor,<sup>234–236</sup> and clinical experience suggests that reversion of neutropenia is a key factor in the outcome of a fungal infection.<sup>218,237</sup>

Reviewing recent clinical cases reported in the literature, four CF patients treated with antifungal drugs because of a suspected pulmonary *Scedosporium/Lomentospora* infection have been reported since 2013.<sup>80,238–240</sup> Moreover, in Germany 36 cases of antifungal treatment of *Scedosporium/Lomentospora* infections in patients with CF were analyzed (Schwarz C et al. unpublished results). In 20/36 antifungal courses a therapeutic response was achieved (regress in radiology or symptoms, or increase in FEV1). These results demonstrated a significant superiority of the use of a combination of three drugs *versus* two and two drugs *versus* one drug. Among the antifungal drugs, voriconazole remains the first therapeutic choice,<sup>200</sup> potentially combined with an echinocandin for *Scedosporium* infections or with terbinafine for *Lomentospora* infections.

### Prospects in susceptibility to antifungals and resistance mechanisms

Among the drugs that are currently in the pipelines, one might be promising for treatment of *Scedosporium/Lomentospora* infections. The Japanese company Eisai Co. discovered E1210, a new first-in-class broad spectrum antifungal drug acting *in vitro* against clinically important yeasts and molds,<sup>241</sup> and *in vivo* in experimental models of candidiasis, aspergillosis, and fusariosis.<sup>242</sup> This drug targets the inositol acylation step in the biosynthesis pathway of the glycosyl phosphatidyl inositol (GPI) anchor. GPI-anchored cell wall proteins play a key role in fungal biology and virulence, and blockage of this metabolic pathway results in defects in cell wall biosynthesis, hyphal elongation and adherence of fungal cells to biological substrates. *In vitro* susceptibility testing using a large set of *S. apiospermum* ( $n = 28$ ), *S. aurantiacum* ( $n = 7$ ) and *L. prolificans* ( $n = 28$ ) isolates revealed that MICs using E1210 were at least 10 fold lower than found in currently used drugs, including voriconazole.<sup>243</sup> This compound, which is licensed since 2015 by Amplyx (San Diego, USA–APX001) was approved on June 2016 by the FDA for treatment of candidiasis, invasive aspergillosis and coccidioidomycosis.

Mutations in the “hot spot” regions of the *Fks1* gene, encoding the catalytic subunit of the  $\beta$ -1,3-glucan synthase (the target of echinocandins), have been described, which may explain the reduced susceptibility of *Scedosporium* species and *L. prolificans* to echinocan-

dins.<sup>244</sup> The low *in vitro* susceptibility (or primary resistance) of *Scedosporium/Lomentospora* species to azole drugs may result from resistance mechanisms similar to those extensively studied for *A. fumigatus*.<sup>245–249</sup> such as point mutations in the coding sequence of *CYP51A* orthologues leading to a reduced affinity of azole drugs for their target, or constitutive overexpression of some efflux pumps. Specifically *L. prolificans* showed alterations in of shorter and wider hyphae and structural and compositional changes in the CW, possibly mediating *L. prolificans* resistance to VRC.<sup>250</sup>

### Future trends in antifungal drugs

There are nowadays some very promising novel antifungal compounds, such as F901318 (Chen S, unpublished results) and *N*-chlorotaurine (NCT). The F901318 compound represents a novel class of antifungal drug that inhibits dihydroorotate dehydrogenase, a key enzyme in pyrimidine biosynthesis.<sup>251</sup> The compound has been recently investigated for 50 clinical *Scedosporium* and *Lomentospora* isolates (Biswas et al. *In vitro* susceptibility testing of the novel orotomide antifungal agent F901318 against Australian *Scedosporium* and *Lomentospora* pathogens, ECCMID, Vienna, Austria, 22–25 April 2017, P1704), and it was active against all isolates of *L. prolificans* as well as *S. apiospermum*, *S. boydii*, and *S. aurantiacum*, with MICs falling ranging from 0.125 to 0.5 mg/l. Similar results have been found in another study (Alastruey-Izquierdo *et al.* unpublished data) testing 123 clinical isolates of *S. apiospermum*, *S. boydii*, *S. aurantiacum*, *S. dehoogii*, *S. ellipsoideus*, and *L. prolificans* with MIC range for all isolates of 0.007–0.5, and by Wiederhold and coworkers against *S. apiospermum*, *S. aurantiacum*, *S. dehoogii*, *S. boydii*, and *L. prolificans*, with MIC ranging from  $\leq 0.008$  to 0.25, with the last species being the most resistant ones.<sup>252</sup>

The *N*-chloro derivative of the amino acid taurine is a long-lived oxidant generated by activated granulocytes and monocytes during inflammation and oxidative burst in phagolysosomes.<sup>253</sup> Moreover, it is more stable and much less toxic *in vivo* than HOCl.<sup>254</sup>

In the 90s, the chemical synthesis of NCT as a crystalline sodium salt (Cl-HN-CH<sub>2</sub>-CH<sub>2</sub>-SO<sub>3</sub>Na) could be established, demonstrating broad-spectrum killing activity against microbes.<sup>255,256</sup> Due to its unspecific mechanism of action, development of resistance is extremely improbable. Three key features of NCT contribute to its successful clinical application: (1) transhalogenation:<sup>257</sup> which makes the net microbicidal activity of NCT markedly enhanced *in vivo*, above all against fungi; (2) chlorine cover:<sup>258</sup> which avoids regrowth (postantifungal effect) and induces



loss of virulence; (3) inactivation of virulence factors of pathogens.<sup>257</sup>

Clinical phase I and II studies demonstrated very good tolerability of topical 1% (55 mM) NCT in aqueous solution for skin ulcers, conjunctivitis, external otitis, and oral infections.<sup>256</sup> Recently, inhaled 1% NCT was well tolerated in pigs, mice, and humans (pilot tests and a phase I study), respectively.<sup>259–261</sup>

At this concentration, NCT was able to kill all *Scedosporium* species tested, that is, both hyphae and conidia of *S. apiospermum*, *S. boydii*, and *L. prolificans*, within several hours at pH 7.1 and 37°C.<sup>262</sup> As expected, addition of ammonium chloride (NH<sub>4</sub>Cl) reduced the killing times to approximately 5 min because of transhalogenation. Indeed, LIVE/DEAD staining of conidia disclosed increased permeability of the cell membrane and wall, which is decisive for killing. However, short, sublethal incubation times of 10–60 min in plain NCT significantly increased germination time and decreased germination rate of conidia. Moreover, such sublethally treated conidia lost their virulence *in vivo* after injection into larvae of *G. mellonella*, so that the larvae survived similar to mock-injected controls.<sup>262</sup>

A second study was done to investigate NCT on its microbicidal activity *in vitro* in artificial sputum medium (ASM) mimicking the composition of cystic fibrosis mucus at 37°C and pH 6.9.<sup>263</sup> Under these conditions, 1% NCT killed bacteria and spores already within 10 min and 15 min, respectively, to the detection limit of 10<sup>2</sup> CFU/ml (reduction by 5–6 log<sub>10</sub>). A reduction by 2 log<sub>10</sub> was still achieved by 0.1% (bacteria) and 0.3% (fungi) NCT largely within 10–30 min. This markedly more rapid killing (particularly of fungi) in ASM compared to phosphate buffer can be explained by transhalogenation.

In this review, the state-of-the-art of the emerging opportunistic fungal pathogens *Scedosporium/Lomentospora* is discussed, mainly focusing on the scientific knowledge acquired in the last decade. Summarizing, in taxonomy the genus *Lomentospora* is clearly independent from *Scedosporium*, which currently contains ten species. These fungi are found in environments of high human activity, polluted waters and soils/composts, while their prevalence varies with geography, environmental pH and chemical content, especially aliphatic hydrocarbons. They infect immunosuppressed and immunocompetent individuals where near-drowning events pose a special risk. Furthermore, colonization of the respiratory tract is common in patients with chronic lung diseases such as CF.

The main virulence factors described are PRM and other cell-wall peptidopolysaccharides, proteolytic enzymes, superoxide dismutase, catalase, siderophores, and melanin. The immune status of the patient seems vital to control infections, being TLRs and Dectin-1 crucial for fungal recognition and phagocytosis. Specific

response, including humoral, might also be of importance. The difficulty to detect and identify these fungi from nonsterile samples results in the fact that the real epidemiology remains to be undetermined, warranting future efforts on the improvement of conventional methods, molecular tools, detection of serological markers and secondary metabolites. A rapid and specific detection of the etiologic agent remains to be very important for the initiation of appropriate treatment. Regarding therapy, although several new strategies are being tested with promising results, nowadays a combination of two or even three anti-fungal drugs is recommended. Among the future perspectives, in addition to immunotherapy, NCT deserves to be mentioned because its broad-spectrum microbicidal activity, tolerability, and anti-inflammatory properties.

In conclusion, although great advances in *Scedosporium/Lomentospora* have been made, much remains to be ascertained, including (1) the identification of definitive markers for the definition of species in *Scedosporium* that allow a better knowledge of its distribution and impact in human pathology, (2) a deeper understanding of its survival strategies and interaction with hosts, (3) the development of faster, accurate and easy-to-implement clinical tools for diagnosis, and (4) the finding of *in vivo* active compounds to treat the wide range of infections, many of the life-threatening, caused by these fungi.

## Acknowledgments

The authors gratefully acknowledge the support to V.H. from Czech Science Foundation (16-20229S), to W.M. and C.S. from the National Health and Medical Research Council of Australia (APP1031952 and APP1121936), to A.R., A.R.G., and F.L.H. from the University of the Basque Country (UPV/EHU) (GIU15/36), and to E.B.B. from the Conselho Nacional de Desenvolvimento Científico e Tecnológico (CNPq) and Fundação de Amparo à Pesquisa no Estado do Rio de Janeiro (FAPERJ).

## Declaration of interest

The authors report no conflicts of interest. The authors alone are responsible for the content and the writing of the paper.

## References

1. Brown GD, Denning DW, Gow NAR, Levitz SM, Netea MG, White TC. Hidden killers: human fungal infections. *Sci Transl Med*. 2012; 4: 165rv13.
2. Lackner M, de Hoog GS, Yang L et al. Proposed nomenclature for *Pseudallescheria*, *Scedosporium* and related genera. *Fungal Divers*. 2014; 67: 1–10.
3. Cortez KJ, Roilides E, Quiroz-Telles F et al. Infections caused by *Scedosporium* spp. *Clin Microbiol Rev*. 2008; 21: 157–197.
4. Richardson M, Lass-Flörl C. Changing epidemiology of systemic fungal infections. *Clin Microbiol Infect*. 2008; 14: 5–24.

5. Guarro J, Kantarcioglu AS, Horr  R et al. *Scedosporium apiospermum*: changing clinical spectrum of a therapy-refractory opportunist. *Med Mycol.* 2006; 44: 295–327.
6. Paugam A, Baixench MT, Demazes-Dufeu N et al. Characteristics and consequences of airway colonization by filamentous fungi in 201 adult patients with cystic fibrosis in France. *Med Mycol.* 2010; 48: S32–S36.
7. Cimon B, Carr re J, Vinatier JF, Chazal te JP, Chabasse D, Bouchara JP. Clinical significance of *Scedosporium apiospermum* in patients with cystic fibrosis. *Eur J Clin Microbiol Infect Dis.* 2000; 19: 53–56.
8. Heath CH, Slavlin MA, Sorrell TC et al. Population-based surveillance for scedosporiosis in Australia: epidemiology, disease manifestations and emergence of *Scedosporium aurantiacum* infection. *Clin Microbiol Infect.* 2009; 15: 689–693.
9. Rodriguez-Tudela JL, Berenguer J, Guarro J et al. Epidemiology and outcome of *Scedosporium prolificans* infection, a review of 162 cases. *Med Mycol.* 2009; 47: 359–370.
10. Grenouillet F, Botterel F, Crouzet J et al. *Scedosporium prolificans*: an emerging pathogen in France? *Med Mycol.* 2009; 47: 343–350.
11. Tintelnot K, Just-N bling G, Horr  R et al. A review of German *Scedosporium prolificans* cases from 1993 to 2007. *Med Mycol.* 2009; 47: 351–358.
12. Lackner M, De Hoog GS, Verweij PE et al. Species-specific antifungal susceptibility patterns of *Scedosporium* and *Pseudallescheria* species. *Antimicrob Agents Chemother.* 2012; 56: 2635–2642.
13. McNeill J, Barrie FR, Buck WR et al. (eds.) *International Code of Nomenclature for Algae, Fungi, and Plants (Melbourne Code)*. Regnum Vegetabile 154. Oberreifenberg, Germany: Koeltz Sci Books, 2012.
14. Gilgado F, Cano J, Gene J, Guarro J. Molecular phylogeny of the *Pseudallescheria boydii* species complex: Proposal of two new species. *J Clin Microbiol.* 2005; 43: 4930–4942.
15. Gilgado F, Cano J, Gen  J, Sutton DA, Guarro J. Molecular and phenotypic data supporting distinct species statuses for *Scedosporium apiospermum* and *Pseudallescheria boydii* and the proposed new species *Scedosporium dehoogii*. *J Clin Microbiol.* 2008; 46: 766–771.
16. Zeng JS, Fukushima K, Takizawa K et al. Intraspecific diversity of species of the *Pseudallescheria boydii* complex. *Med Mycol.* 2007; 45: 547–558.
17. Lackner M, Klaassen CH, Meis JF, van den Ende AHGG, de Hoog GS. Molecular identification tools for sibling species of *Scedosporium* and *Pseudallescheria*. *Med Mycol.* 2012; 50: 497–508.
18. Lackner M, Hagen F, Meis JF et al. Susceptibility and diversity in the therapy-refractory genus *Scedosporium*. *Antimicrob Agents Chemother.* 2014; 58: 5877–5885.
19. Chen M, Zeng J, de Hoog GS et al. The “species complex” issue in clinically relevant fungi: A case study in *Scedosporium apiospermum*. *Fungal Biol.* 2016; 120: 137–146.
20. Rainer J, Kaltseis J. Diversity in *Scedosporium dehoogii* (*Microasaceae*): *S. deficiens* sp. nov. *Sydowia.* 2010; 62: 137–147.
21. Crous PW, Wingfield MJ, Burgess TI et al. Fungal planet description sheets: 469–557. *Persoonia.* 2016; 37: 218–403.
22. Hawksworth DL, Crous PW, Redhead SA et al. The Amsterdam declaration on fungal nomenclature. *IMA Fungus.* 2011; 2: 105–112.
23. Hennebert GL, Desai BG. *Lomentospora prolificans*, a new hyphomycete from greenhouse soil. *Mycotaxon.* 1974; 1: 45–50.
24. de Hoog GS, Marvin-Sikkema FD, Lahpoor GA, Gottschall JC, Prins RA, Guicho E. Ecology and physiology of the emerging opportunistic fungi *Pseudallescheria boydii* and *Scedosporium prolificans*. *Mycoses.* 1994; 37: 71–78.
25. Kaltseis J, Rainer J, de Hoog GS. Ecology of *Pseudallescheria* and *Scedosporium* species in human-dominated and natural environments and their distribution in clinical samples. *Med Mycol.* 2009; 47: 398–405.
26. April TM, Abbott SP, Foght JM, Currah RS. Degradation of hydrocarbons in crude oil by the ascomycete *Pseudallescheria boydii* (*Microasaceae*). *Can J Microbiol.* 1998; 44: 270–278.
27. Horr  R, Lackner M, Buzina W, Tintelnot K. Near-drowning and cerebral infections caused by fungi belonging to the *Pseudallescheria/Scedosporium*-complex. *Anesthesiol Intensivmed Notfallmed Schmerzther.* 2010; 45: 152–158 [in German].
28. Harun A, Gilgado F, Chen SCA, Meyer W. Abundance of *Pseudallescheria/Scedosporium* species in the Australian urban environment suggests a possible source for scedosporiosis including the colonization of airways in cystic fibrosis. *Med Mycol.* 2010; 48: S70–S76.
29. Janda-Ulfig K, Ulfig K, Cano J, Guarro J. A study of the growth of *Pseudallescheria boydii* isolates from sewage sludge and clinical sources on tributyrin, rapeseed oil, biodiesel oil and diesel oil. *Ann Agric Environ Med.* 2008; 15: 45–49.
30. Rougeron A, Schuliar G, Leto J et al. Human-impacted areas of France are environmental reservoirs of the *Pseudallescheria boydii/Scedosporium apiospermum* species complex. *Environ Microbiol.* 2015; 17: 1039–1048.
31. Selbmann L, Egidi E, Isola D et al. Biodiversity, evolution and adaptation of fungi in extreme environments. *Plant Biosystems.* 2013; 147: 237–246.
32. Rom o D, Sabino R, Verissimo C et al. Children and Sand Play: Screening of potential harmful microorganisms in sandboxes, parks, and beaches. *Curr Fungal Infect Rep.* 2015; 9: 155–163.
33. Kaltseis J. Opportunistic human pathogenic fungi of the genera *Pseudallescheria/Scedosporium*. PhD Thesis. University of Innsbruck, 2013.
34. Rainer J, Rambach G, Kaltseis J, Hagleitner M, Heiss S, Speth C. Phylogeny and immune evasion: a putative correlation for cerebral *Pseudallescheria/Scedosporium* infections. *Mycoses.* 2011; 54: 48–55.
35. Bertrand S, Larcher G, Landreau A, Richomme P, Duval O, Bouchara JP. Hydroxamate siderophores of *Scedosporium apiospermum*. *BioMetals.* 2009; 22: 1019–1029.
36. De Gannes V, Eudoxie G, Hickey WJ. Insights into fungal communities in composts revealed by 454-pyrosequencing: Implications for human health and safety. *Front Microbiol.* 2013; 4: 164.
37. Rodriguez-Tudela JL, Berenguer J, Guarro J et al. Epidemiology and outcome of *Scedosporium prolificans* infection, a review of 162 cases. *Med Mycol.* 2009; 47: 359–370.
38. Husain S, Mu oz P, Forrest G et al. Infections due to *Scedosporium apiospermum* and *Scedosporium prolificans* in transplant recipients: clinical characteristics and impact of antifungal agent therapy on outcome. *Clin Infect Dis.* 2005; 40: 89–99.
39. Delhaes L, Harun A, Chen SCA et al. Molecular typing of Australian *Scedosporium* isolates showing genetic variability and numerous *S. aurantiacum*. *Emerg Infect Dis.* 2008; 14: 282–290.
40. Idigoras P, P rez-Trallero E, Pi eiro L et al. Disseminated infection and colonization by *Scedosporium prolificans*: a review of 18 cases, 1990–1999. *Clin Infect Dis.* 2001; 32: e158–e165.
41. Bhagavatula S, Vale L, Evans J, Carpenter C, Barnes RA. *Scedosporium prolificans* osteomyelitis following penetrating injury: A case report. *Med Mycol Case Rep.* 2014; 4: 26–29.
42. Johnson LS, Shields RK, Clancy CJ. Epidemiology, clinical manifestations, and outcomes of *Scedosporium* infections among solid organ transplant recipients. *Transpl Infect Dis.* 2014; 16: 578–587.
43. Song MJ, Lee JH, Lee NY. Fatal *Scedosporium prolificans* infection in a paediatric patient with acute lymphoblastic leukaemia. *Mycoses.* 2011; 54: 81–83.
44. Kooijman CM, Kampinga GA, de Hoog GS, Goudswaard WB, Reijnen MM. Successful treatment of *Scedosporium aurantiacum* osteomyelitis in an immunocompetent patient. *Surg Infect.* 2007; 8: 605–610.
45. Nakamura Y, Suzuki N, Nakajima Y et al. *Scedosporium aurantiacum* brain abscess after near-drowning in a survivor of a tsunami in Japan. *Respir Investig.* 2013; 51: 207–211.
46. Pappas PG, Alexander BD, Andes DR et al. Invasive fungal infections among organ transplant recipients: results of the Transplant-Associated Infection Surveillance Network (TRANSNET). *Clin Infect Dis.* 2010; 50: 1101–1111.
47. Shoham S, Marr KA. Invasive fungal infections in solid organ transplant recipients. *Future Microbiol.* 2012; 7: 639–655.
48. Lamarin GA, Chamilos G, Lewis RE, Safdar A, Raad II, Kontoyiannis DP. *Scedosporium* infection in a tertiary care cancer center: a review of 25 cases from 1989–2006. *Clin Infect Dis.* 2006; 43: 1580–1584.

49. Baddley JW, Stroud TP, Salzman D, Pappas PG. Invasive mold infections in allogeneic bone marrow transplant recipients. *Clin Infect Dis*. 2001; 32: 1319–1324.
50. Doligalski CT, Benedict K, Cleveland AA et al. Epidemiology of invasive mold infections in lung transplant recipients. *Am J Transplant*. 2014; 14: 1328–1333.
51. Castiglioni B, Sutton DA, Rinaldi MG, Fung J, Kusne S. *Pseudallescheria boydii* (Anamorph *Scedosporium apiospermum*). Infection in solid organ transplant recipients in a tertiary medical center and review of the literature. *Medicine*. 2002; 81: 333–348.
52. Morio F, Horeau-Langlard D, Gay-Andrieu F et al. Disseminated *Scedosporium/Pseudallescheria* infection after double-lung transplantation in patients with cystic fibrosis. *J Clin Microbiol*. 2010; 48: 1978–1982.
53. Ong A, Blyth CC, Bency R et al. Fatal mycotic aneurysms due to *Scedosporium* and *Pseudallescheria* infection. *J Clin Microbiol*. 2011; 49: 2067–2071.
54. Sayah DM, Schwartz BS, Kukreja J, Singer JP, Golden JA, Leard LE. *Scedosporium prolificans* pericarditis and mycotic aortic aneurysm in a lung transplant recipient receiving voriconazole prophylaxis. *Transpl Infect Dis*. 2013; 15: E70–E74.
55. Caira M, Girmenia C, Valentini CG et al. Scedosporiosis in patients with acute leukemia: a retrospective multicenter report. *Haematologica*. 2008; 93: 104–110.
56. Cooley L, Spelman D, Thursky K, Slavin M. Infection with *Scedosporium apiospermum* and *S. prolificans*, Australia. *Emerg Infect Dis*. 2007; 13: 1170–1177.
57. Tammer I, Tintelnot K, Braun-Dullaeus RC et al. Infections due to *Pseudallescheria/Scedosporium* species in patients with advanced HIV disease - a diagnostic and therapeutic challenge. *Int J Infect Dis*. 2011; 15: e422–e429.
58. Gompels MM, Bethune CA, Jackson G, Spickett GP. *Scedosporium apiospermum* in chronic granulomatous disease treated with an HLA matched bone marrow transplant. *J Clin Pathol*. 2002; 55: 784–786.
59. Jabado N, Casanova JL, Haddad E et al. Invasive pulmonary infection due to *Scedosporium apiospermum* in two children with chronic granulomatous disease. *Clin Infect Dis*. 1998; 27: 1437–1441.
60. Santos PE, Oleastro M, Galicchio M, Zelazko M. Fungal infections in paediatric patients with chronic granulomatous disease. *Rev Iberoam Micol*. 2000; 17: 6–9 [in Spanish].
61. Pihet M, Carrere J, Cimon B et al. Occurrence and relevance of filamentous fungi in respiratory secretions of patients with cystic fibrosis - a review. *Med Mycol*. 2009; 47: 387–397.
62. Montagna MT, Barbuti G, Paglionico F et al. Retrospective analysis of microorganisms isolated from cystic fibrosis patients in Southern Italy, 2002–2010. *J Prev Med Hyg*. 2011; 52: 209–214.
63. Güngör Ö, Tamay Z, Güler N, Erturan Z. Frequency of fungi in respiratory samples from Turkish cystic fibrosis patients. *Mycoses*. 2013; 56: 123–129.
64. Ziesing S, Suerbaum S, Sedlacek L. Fungal epidemiology and diversity in cystic fibrosis patients over a 5-year period in a national reference center. *Med Mycol*. 2016; 54: 781–786.
65. Zouhair R, Rougeron A, Razafimandimby B, Kobi A, Bouchara JP, Giraud S. Distribution of the different species of the *Pseudallescheria boydii/Scedosporium apiospermum* complex in French patients with cystic fibrosis. *Med Mycol*. 2013; 51: 603–613.
66. Sedlacek L, Graf B, Schwarz C et al. Prevalence of *Scedosporium* species and *Lomentospora prolificans* in patients with cystic fibrosis in a multicenter trial by use of a selective medium. *J Cyst Fibros*. 2015; 14: 237–241.
67. Lackner M, Rezusta A, Villuendas MC, Palacian MP, Meis JF, Klaassen CH. Infection and colonisation due to *Scedosporium* in Northern Spain. An in vitro antifungal susceptibility and molecular epidemiology study of 60 isolates. *Mycoses*. 2011; 54: 12–21.
68. Blyth CC, Harun A, Middleton PG et al. Detection of occult *Scedosporium* species in respiratory tract specimens from patients with cystic fibrosis by use of selective media. *J Clin Microbiol*. 2010; 48: 314–316.
69. Buonfrate D, Gobbi F, Angheben A et al. Autochthonous cases of mycetoma in Europe: report of two cases and review of literature. *PLoS One*. 2014; 9: e100590.
70. Queiroz-Telles F, McGinnis MR, Salkin I, Graybill JR. Subcutaneous mycoses. *Infect Dis Clin North Am*. 2003; 17: 59–85.
71. Oliveira FM, Unis G, Hochegger B, Severo LC. *Scedosporium apiospermum* eumycetoma successfully treated with oral voriconazole: report of a case and review of the Brazilian reports on scedosporiosis. *Rev Inst Med Trop Sao Paulo*. 2013; 55: 121–123.
72. Green WO, Adams TE. Mycetoma in the United States: a review and report of seven additional cases. *Am J Clin Pathol*. 1964; 42: 75–91.
73. Tintelnot K, Wagner N, Seibold M, de Hoog GS, Horré R. Re-identification of clinical isolates of the *Pseudallescheria boydii*-complex involved in near-drowning. *Mycoses*. 2008; 51: 11–16.
74. Garzoni C, Emonet S, Legout L et al. Atypical infections in tsunami survivors. *Emerg Infect Dis*. 2005; 11: 1591–1593.
75. Defontaine A, Zouhair R, Cimon B et al. Genotyping study of *Scedosporium apiospermum* isolates from patients with cystic fibrosis. *J Clin Microbiol*. 2002; 40: 2108–2114.
76. Bernhardt A, Sedlacek L, Wagner S, Schwarz C, Würstl B, Tintelnot K. Multilocus sequence typing of *Scedosporium apiospermum* and *Pseudallescheria boydii* isolates from cystic fibrosis patients. *J Cyst Fibros*. 2013; 12: 592–598.
77. Blyth CC, Middleton PG, Harun A, Sorrell TC, Meyer W, Chen SC-A. Clinical associations and prevalence of *Scedosporium* spp. in Australian cystic fibrosis patients: identification of novel risk factors? *Med Mycol*. 2010; 48: S37–S44.
78. Kantarcioglu AS, de Hoog SG, Guarro J. Clinical characteristics and epidemiology of pulmonary pseudallescheriasis. *Rev Iberoam Micol*. 2012; 29: 1–13.
79. Yamamoto N, Bibby K, Qian J et al. Particle-size distributions and seasonal diversity of allergenic and pathogenic fungi in outdoor air. *ISME J*. 2012; 6: 1801–1811.
80. Schwarz C, Thronicke A, Staab D, Tintelnot K. *Scedosporium apiospermum*: a fungal pathogen causing pneumonia in a patient with cystic fibrosis. *JMM Case Reports*. 2015; 2. doi: 10.1099/jmmcr.0.000061
81. Chen SC-A, Patel S, Meyer W et al. *Pseudomonas aeruginosa* inhibits the growth of *Scedosporium* and *Lomentospora* in vitro. *Mycopathologia*. 2017. doi:10.1007/s11046-017-0140-x.
82. Lu Q, van den Ende AHGG, de Hoog GS et al. Reverse line blot hybridisation screening of *Pseudallescheria/Scedosporium* species in patients with cystic fibrosis. *Mycoses*. 2011; 54: 5–11.
83. Gu Z, Buelow DR, Petraitiene R, Petraitis V, Walsh TJ, Hayden RT. Quantitative multiplexed detection of common pulmonary fungal pathogens by labeled primer polymerase chain reaction. *Arch Pathol Lab Med*. 2014; 138: 1474–1480.
84. Russell GK, Gadhok R, Simmonds NJ. The destructive combination of *Scedosporium apiospermum* lung disease and exuberant inflammation in cystic fibrosis. *Paediatr Respir Rev*. 2013; 14: 22–25.
85. Mina S, Marot-Leblond A, Cimon B et al. Purification and characterization of a mycelial catalase from *Scedosporium boydii*, a useful tool for specific antibody detection in patients with cystic fibrosis. *Clin Vaccine Immunol*. 2015; 22: 37–45.
86. Montejo M, Muñoz M, Zarraga S et al. Case Report. Infection due to *Scedosporium apiospermum* in renal transplant recipients: a report of two cases and literature review of central nervous system and cutaneous infections by *Pseudallescheria boydii/Sc. apiospermum*. *Mycoses*. 2002; 45: 418–427.
87. Uenotsuchi T, Moroi Y, Urabe K et al. Cutaneous *Scedosporium apiospermum* infection in an immunocompromised patient and a review of the literature. *Acta Derm Venereol*. 2005; 85: 156–159.
88. Thomson S, Alibhai K, Winkelaar G et al. Case report of vertebral osteomyelitis and mycotic abdominal aortic aneurysm caused by *Scedosporium apiospermum* in a lung transplant patient with cystic fibrosis. *In: Transplantation Proceedings*. 2015; 47: 204–209.
89. Denton EJ, Smibert O, Gooi J et al. Invasive *Scedosporium* sternal osteomyelitis following lung transplant: Cured. *Med Mycol Case Rep*. 2016; 12: 14–16.

90. Taj-Aldeen SJ, Rammaert B, Gamaletsou M et al. Osteoarticular infections caused by non-*Aspergillus* filamentous fungi in adult and pediatric patients: a systematic review. *Medicine*. 2015; 94: e2078.
91. Thomas PA, Kaliyamurthy J. Mycotic keratitis: epidemiology, diagnosis and management. *Clin Microbiol Infect*. 2013; 19: 210–220.
92. Bernhardt A, Seibold M, Rickerts V, Tintelnat K. Cluster analysis of *Scedosporium boydii* infections in a single hospital. *Int J Med Microbiol*. 2015; 305: 724–728.
93. Panackal AA, Marr KA. *Scedosporium/Pseudallescheria* Infections. *Semin Respir Crit Care Med*. 2004; 25: 171–181.
94. Neofytos D, Fishman JA, Horn D et al. Epidemiology and outcome of invasive fungal infections in solid organ transplant recipients. *Transpl Infect Dis*. 2010; 12: 220–229.
95. Musk M, Chambers D, Chin W, Murray R, Gabbay E. Successful treatment of disseminated *Scedosporium* infection in 2 lung transplant recipients: review of the literature and recommendations for management. *J Hear Lung Transplant*. 2006; 25: 1268–1272.
96. Kim SH, Ha YE, Youn JC et al. Fatal scedosporiosis in multiple solid organ allografts transmitted from a nearly-drowned donor. *Am J Transplant*. 2015; 15: 833–840.
97. Katragkou A, Dotis J, Kotsiou M, Tamiolaki M, Roilides E. *Scedosporium apiospermum* infection after near-drowning. *Mycoses*. 2007; 50: 412–421.
98. Gelabert-González M, Llovo-Taboada J, Reyes-Santías R et al. *Scedosporium apiospermum* brain abscess. Report of one case with literature review. *Neurocirugia*. 2010; 21: 125–131 [in Spanish].
99. Berenguer J, Diaz-Mediavilla J, Urra D, Muñoz P. Central nervous system infection caused by *Pseudallescheria Boydii*: case report and review. *Rev Infect Dis*. 1989; 11: 890–896.
100. Bryan C, DiSalvo A, Kaufman L, Kaplan W, Brill AH, Abbott DC. *Petridium boydii* infection of the sphenoid sinus. *Am J Clin Pathol*. 1980; 74: 846–851.
101. Kelly M, Stevens R, Konecny P. *Lomentospora prolificans* endocarditis - case report and literature review. *BMC Infect Dis*. 2016; 16: 36.
102. Wakabayashi Y, Okugawa S, Tatsuno K et al. *Scedosporium prolificans* endocarditis: case report and literature review. *Intern Med*. 2016; 55: 79–82.
103. Sarvat B, Sarria JC. Implantable cardioverter-defibrillator infection due to *Scedosporium apiospermum*. *J Infect*. 2007; 55: e109–e113.
104. Fernandez Guerrero ML, Askari E, Prieto E, Gadea I, Román A. Emerging infectious endocarditis due to *Scedosporium prolificans*: a model of therapeutic complexity. *Eur J Clin Microbiol Infect Dis*. 2011; 30: 1321–1324.
105. Wood GM, McCormack JG, Muir DB et al. Clinical features of human infection with *Scedosporium inflatum*. *Clin Infect Dis*. 1992; 14: 1027–1033.
106. Berenguer J, Rodriguez-Tudela JL, Richard C et al. Deep infections caused by *Scedosporium prolificans*. A report on 16 cases in Spain and a review of the literature. *Scedosporium Prolificans Spanish Study Group. Medicine*. 1997; 76: 256–265.
107. Alvarez M, Lopez-Ponga B, Rayon C et al. Nosocomial outbreak caused by *Scedosporium prolificans (inflatum)*: four fatal cases in leukemic patients. *J Clin Microbiol*. 1995; 33: 3290–3295.
108. Sahi H, Avery RK, Minai OA et al. *Scedosporium apiospermum (Pseudallescheria boydii)* infection in lung transplant recipients. *J Hear Lung Transplant*. 2007; 26: 350–356.
109. Kennedy B, Larcombe R, Chaptini C, Gordon DL. Interaction between voriconazole and flucloxacilin during treatment of disseminated *Scedosporium apiospermum* infection. *J Antimicrob Chemother*. 2015; 70: 2171–2173.
110. Cooney NM, Klein BS. Fungal adaptation to the mammalian host: it is a new world, after all. *Curr Opin Microbiol*. 2008; 11: 511–516.
111. Roilides E, Simitsopoulou M. Local innate host response and filamentous fungi in patients with cystic fibrosis. *Med Mycol*. 2010; 48: S22–S31.
112. Walsh TJ, Roilides E, Cortez K, Kottitil S, Bailey J, Lyman CA. Control, immunoregulation, and expression of innate pulmonary host defenses against *Aspergillus fumigatus*. *Med Mycol*. 2005; 43: S165–S172.
113. Netea MG, Brown GD, Kullberg BJ, Gow NAR. An integrated model of the recognition of *Candida albicans* by the innate immune system. *Nat Rev Microbiol*. 2008; 6: 67–78.
114. Romani L. Immunity to fungal infections. *Nat Rev Immunol*. 2011; 11: 275–288.
115. Lamaris GA, Chamilos G, Lewis RE, Kontoyiannis DP. Virulence studies of *Scedosporium* and *Fusarium* species in *Drosophila melanogaster*. *J Infect Dis*. 2007; 196: 1860–1864.
116. Bittencourt VCB, Figueiredo RT, da Silva RB et al. An alpha-glucan of *Pseudallescheria boydii* is involved in fungal phagocytosis and toll-like receptor activation. *J Biol Chem*. 2006; 281: 22614–22623.
117. Lamaris GA, Lewis RE, Chamilos G et al. Caspofungin-mediated beta-glucan unmasking and enhancement of human polymorphonuclear neutrophil activity against *Aspergillus* and non-*Aspergillus* hyphae. *J Infect Dis*. 2008; 198: 186–192.
118. Lopes LCL, da Silva MID, Bittencourt VCB et al. Glycoconjugates and polysaccharides from the *Scedosporium/Pseudallescheria boydii* complex: structural characterisation, involvement in cell differentiation, cell recognition and virulence. *Mycoses*. 2011; 54: 28–36.
119. Figueiredo RT, Bittencourt VC, Lopes LCL, Sassaki G, Barreto-Berger E. Toll-like receptors (TLR2 and TLR4) recognize polysaccharides of *Pseudallescheria boydii* cell wall. *Carbohydr Res*. 2012; 356: 260–264.
120. Figueiredo RT, Fernandez PL, Dutra FF et al. TLR4 recognizes *Pseudallescheria boydii* conidia and purified rhamnmannans. *J Biol Chem*. 2010; 285: 40714–40723.
121. Brakhage AA, Bruns S, Thywissen A, Zipfel PF, Behnen J. Interaction of phagocytes with filamentous fungi. *Curr Opin Microbiol*. 2010; 13: 409–415.
122. Waldorf AR, Levitz SM, Diamond RD. In vivo bronchoalveolar macrophage defense against *Rhizopus oryzae* and *Aspergillus fumigatus*. *J Infect Dis*. 1984; 150: 752–760.
123. Waldorf AR. Pulmonary defense mechanisms against opportunistic fungal pathogens. *Immunol Ser*. 1989; 47: 243–271.
124. Gil-Lamaignere C, Maloukou A, Rodriguez-Tudela JL, Roilides E. Human phagocytic cell responses to *Scedosporium prolificans*. *Med Mycol*. 2001; 39: 169–175.
125. Roilides E, Holmes A, Blake C, Venzon D, Pizzo PA, Walsh TJ. Antifungal activity of elutriated human monocytes against *Aspergillus fumigatus* hyphae: enhancement by granulocyte-macrophage colony-stimulating factor and interferon-gamma. *J Infect Dis*. 1994; 170: 894–899.
126. Gil-Lamaignere C, Winn RM, Simitsopoulou M, Maloukou A, Walsh TJ, Roilides E. Interferon gamma and granulocyte-macrophage colony-stimulating factor augment the antifungal activity of human polymorphonuclear leukocytes against *Scedosporium* spp.: comparison with *Aspergillus* spp. *Med Mycol*. 2005; 43: 253–260.
127. Simitsopoulou M, Gil-Lamaignere C, Avramidis N et al. Antifungal activities of posaconazole and granulocyte-macrophage colony-stimulating factor ex vivo and in mice with disseminated infection due to *Scedosporium prolificans*. *Antimicrob Agents Chemother*. 2004; 48: 3801–3805.
128. Winn RM, Gil-Lamaignere C, Roilides E et al. Effects of interleukin-15 on antifungal responses of human polymorphonuclear leukocytes against *Fusarium* spp. and *Scedosporium* spp. *Cytokine*. 2005; 31: 1–8.
129. Warris A, Netea MG, Verweij PE et al. Cytokine responses and regulation of interferon-gamma release by human mononuclear cells to *Aspergillus fumigatus* and other filamentous fungi. *Med Mycol*. 2005; 43: 613–621.
130. Figari IS, Mori NA, Palladino MA. Regulation of neutrophil migration and superoxide production by recombinant tumor necrosis factors-alpha and -beta: comparison to recombinant interferon-gamma and interleukin-1 alpha. *Blood*. 1987; 70: 979–984.
131. Borish L, Rosenbaum R, Albury L, Clark S. Activation of neutrophils by recombinant interleukin 6. *Cell Immunol*. 1989; 121: 280–289.
132. Gil-Lamaignere C, Roilides E, Mosquera J, Maloukou A, Walsh TJ. Antifungal triazoles and polymorphonuclear leukocytes synergize to cause increased hyphal damage to *Scedosporium prolificans* and *Scedosporium apiospermum*. *Antimicrob Agents Chemother*. 2002; 46: 2234–2237.
133. Gil-Lamaignere C, Roilides E, Maloukou A, Georgopoulou I, Petrikkos G, Walsh TJ. Amphotericin B lipid complex exerts additive antifungal

- activity in combination with polymorphonuclear leucocytes against *Scedosporium prolificans* and *Scedosporium apiospermum*. *J Antimicrob Chemother.* 2002; 50: 1027–1030.
134. Wüthrich M, Deepe G, Klein B. Adaptive Immunity to Fungi. *Annu Rev Immunol.* 2012; 30: 115–148.
  135. Borghi M, Renga G, Puccetti M et al. Antifungal Th immunity: growing up in family. *Front Immunol.* 2014; 5: 506.
  136. Casadevall A. Antibody immunity and invasive fungal infections. *Infect Immun.* 1995; 63: 4211–4218.
  137. Da Silva BA, Sodr e CL, Souza-Gonalves AL et al. Proteomic analysis of the secretions of *Pseudallescheria boydii*, a human fungal pathogen with unknown genome. *J Proteome Res.* 2012; 11: 172–188.
  138. Pellon A, Ramirez-Garcia A, Antoran A et al. *Scedosporium prolificans* immunomes against human salivary immunoglobulin A. *Fungal Biol.* 2014; 118: 94–105.
  139. Pellon A, Ramirez-Garcia A, Buldain I, Antoran A, Rementeria A, Hernandez FL. Immunoproteomics-based analysis of the immunocompetent serological response to *Lomentospora prolificans*. *J Proteome Res.* 2016; 15: 595–607.
  140. Buldain I, Ramirez-Garcia A, Pellon A et al. Cyclophilin and enolase are the most prevalent conidial antigens of *Lomentospora prolificans* recognized by healthy human salivary IgA and cross-react with *Aspergillus fumigatus*. *Proteomics Clin Appl.* 2016; 10: 1058–1067.
  141. Casadevall A, Pirofski LA. Immunoglobulins in defense, pathogenesis, and therapy of fungal diseases. *Cell Host Microbe.* 2012; 11: 447–456.
  142. Pinto MR, de S a ACM, Limongi CL, Rozental S, Santos ALS, Barreto-Bergter E. Involvement of peptidorhamnomannan in the interaction of *Pseudallescheria boydii* and HEp2 cells. *Microbes Infect.* 2004; 6: 1259–1267.
  143. Ortoneda M, Pastor FJ, Mayayo E, Guarro J. Comparison of the virulence of *Scedosporium prolificans* strains from different origins in a murine model. *J Med Microbiol.* 2002; 51: 924–928.
  144. Santos AL, Bittencourt VC, Pinto MR, Silva BA, Barreto-Bergter E. Biochemical characterization of potential virulence markers in the human fungal pathogen *Pseudallescheria boydii*. *Med Mycol.* 2009; 47: 375–386.
  145. Barreto-Bergter E, Sasaki GL, Wagner R et al. The opportunistic fungal pathogen *Scedosporium prolificans*: carbohydrate epitopes of its glycoproteins. *Int J Biol Macromol.* 2008; 42: 93–102.
  146. Gorin PAJ, da Silva MID, Sasaki GL et al. Carbohydrates present in the glycoprotein from conidia of the opportunistic pathogen *Scedosporium prolificans*. *Carbohydr Polym.* 2010; 79: 927–932.
  147. Xisto MI, Bittencourt VC, Liporagi-Lopes LC et al. O-Glycosylation in cell wall proteins in *Scedosporium prolificans* is critical for phagocytosis and inflammatory cytokines production by macrophages. *PLoS One.* 2015; 10: e0123189.
  148. Xisto MI, Liporagi-Lopes LC, Mu oz JE et al. Peptidorhamnomannan negatively modulates the immune response in a scedosporiosis murine model. *Med Mycol.* 2016; 54: 846–855.
  149. Pinto MR, Mulloy B, Haido RM, Travassos LR, Barreto Bergter E. A peptidorhamnomannan from the mycelium of *Pseudallescheria boydii* is a potential diagnostic antigen of this emerging human pathogen. *Microbiology.* 2001; 147: 1499–1506.
  150. Odabasi Z, Paetznick VL, Rodriguez JR, Chen E, McGinnis MR, Ostrosky-Zeichner L. Differences in beta-glucan levels in culture supernatants of a variety of fungi. *Med Mycol.* 2006; 44: 267–272.
  151. Barreto-Bergter E, Pinto MR, Rodrigues ML. Structure and biological functions of fungal cerebrosides. *An Acad Bras Cienc.* 2004; 76: 67–84.
  152. Barreto-Bergter E, Sasaki GL, Souza LM et al. Carbohydrate epitopes in glycoprotein from the opportunistic fungal pathogen *Scedosporium apiospermum*. *Carbohydr Polym.* 2011; 85: 349–355.
  153. Rodrigues ML, Travassos LR, Miranda KR et al. Human antibodies against a purified glucosylceramide from *Cryptococcus neoformans* inhibit cell budding and fungal growth. *Infect Immun.* 2000; 68: 7049–7060.
  154. Pinto MR, Rodrigues ML, Travassos LR, Haido RM, Wait R, Barreto-Bergter E. Characterization of glucosylceramides in *Pseudallescheria boydii* and their involvement in fungal differentiation. *Glycobiology.* 2002; 12: 251–260.
  155. da Silva AF, Rodrigues ML, Farias SE, Almeida IC, Pinto MR, Barreto-Bergter E. Glucosylceramides in *Colletotrichum gloeosporioides* are involved in the differentiation of conidia into mycelial cells. *FEBS Lett.* 2004; 561: 137–143.
  156. Rollin-Pinheiro R, Liporagi-Lopes LC, de Meirelles JV, De Souza LM, Barreto-Bergter E. Characterization of *Scedosporium apiospermum* glucosylceramides and their involvement in fungal development and macrophage functions. *PLoS One.* 2014; 9: e98149.
  157. Larcher G, Cimon B, Symoens F, Tronchin G, Chabasse D, Bouchara JP. A 33 kDa serine proteinase from *Scedosporium apiospermum*. *Biochem J.* 1996; 315: 119–126.
  158. Silva BA., Pinto MR, Soares RM, Barreto-Bergter E, Santos AL. *Pseudallescheria boydii* releases metalloproteinases capable of cleaving several proteinaceous compounds. *Res Microbiol.* 2006; 157: 425–432.
  159. Silva BA, Souza-Gonalves AL, Pinto MR, Barreto-Bergter E, Santos ALS. Metalloproteinase inhibitors arrest vital biological processes in the fungal pathogen *Scedosporium apiospermum*. *Mycoses.* 2011; 54: 105–112.
  160. Pereira MM, Silva BA, Pinto MR, Barreto-Bergter E, dos Santos AL. Proteins and peptidases from conidia and mycelia of *Scedosporium apiospermum* strain HLPB. *Mycopathologia.* 2009; 167: 25–30.
  161. Kiffer-Moreira T, Pinheiro AA, Pinto MR et al. Mycelial forms of *Pseudallescheria boydii* present ectophosphatase activities. *Arch Microbiol.* 2007; 188: 159–166.
  162. Fernando PH, Panagoda GJ, Samaranyake LP. The relationship between the acid and alkaline phosphatase activity and the adherence of clinical isolates of *Candida parapsilosis* to human buccal epithelial cells. *APMIS.* 1999; 107: 1034–1042.
  163. Belanger PH, Johnston DA, Fratti RA, Zhang M, Filler SG. Endocytosis of *Candida albicans* by vascular endothelial cells is associated with tyrosine phosphorylation of specific host cell proteins. *Cell Microbiol.* 2002; 4: 805–812.
  164. Lima OC, Larcher G, Vandeputte P et al. Molecular cloning and biochemical characterization of a Cu,Zn-superoxide dismutase from *Scedosporium apiospermum*. *Microbes Infect.* 2007; 9: 558–565.
  165. Mina S, Staerck C, d’Almeida SM et al. Identification of *Scedosporium boydii* catalase A1 gene, a reactive oxygen species detoxification factor highly expressed in response to oxidative stress and phagocytic cells. *Fungal Biol.* 2015; 119: 1322–1333.
  166. Bertrand S, Bouchara JP, Venier MC, Richomme P, Duval O, Larcher G. N( )-methyl coprogen B, a potential marker of the airway colonization by *Scedosporium apiospermum* in patients with cystic fibrosis. *Med Mycol.* 2010; 48: S98–107.
  167. Thornton CR, Ryder LS, Le Cocq K Soanes DM. Identifying the emerging human pathogen *Scedosporium prolificans* by using a species-specific monoclonal antibody that binds to the melanin biosynthetic enzyme tetrahydroxynaphthalene reductase. *Environ Microbiol.* 2015; 17: 1023–1038.
  168. Ghamrawi S, R enier G, Saulnier P et al. Cell wall modifications during conidial maturation of the human pathogenic fungus *Pseudallescheria boydii*. *PLoS One.* 2014; 9: e100290.
  169. Al-Laaieby A, Kershaw MJ, Penn TJ, Thornton CR. Targeted Disruption of melanin biosynthesis genes in the human pathogenic fungus *Lomentospora prolificans* and Its Consequences for Pathogen Survival. *Int J Mol Sci.* 2016; 17: 444
  170. Elizur A, Cannon CL, Ferkol TW. Airway inflammation in cystic fibrosis. *Chest.* 2008; 133: 489–495.
  171. Regamey N, Tsartsali L, Hilliard TN et al. Distinct patterns of inflammation in the airway lumen and bronchial mucosa of children with cystic fibrosis. *Thorax.* 2012; 67: 164–170.
  172. Accurso F. Update in cystic fibrosis 2005. *Am J Respir Crit Care Med.* 2006; 173: 944–947.
  173. Kimura M, Maenishi O, Ito H, Ohkusu K. Unique histological characteristics of *Scedosporium* that could aid in its identification: Case Report. *Pathol Int.* 2010; 60: 131–136.

174. Rainer J, Kaltseis J, de Hoog SG, Summerbell RC. Efficacy of a selective isolation procedure for members of the *Pseudallescheria boydii* complex. *Antonie Van Leeuwenhoek*. 2008; 93: 315–322.
175. Horr  R, Marklein G, Siekmeier R, Nidermajer S, Reiffert SM. Selective isolation of *Pseudallescheria* and *Scedosporium* species from respiratory tract specimens of cystic fibrosis patients. *Respiration*. 2009; 77: 320–324.
176. Sedlacek L, Graf B, Schwarz C et al. Prevalence of *Scedosporium* species and *Lomentospora prolificans* in patients with cystic fibrosis in a multicenter trial by use of a selective medium. *J Cyst Fibros*. 2015; 14: 237–241.
177. Harun A, Blyth CC, Gilgado F, Middleton P, Chen SC, Meyer W. Development and validation of a multiplex PCR for detection of *Scedosporium* spp. in respiratory tract specimens from patients with cystic fibrosis. *J Clin Microbiol*. 2011; 49: 1508–1512.
178. Horr  R, Schaal KP, Marklein G, de Hoog GS, Reiffert SM. Physiological typing of *Pseudallescheria* and *Scedosporium* strains using Taxa Profile, a semi-automated, 384-well microtitre system. *Mycoses*. 2011; 54: 56–65.
179. Kaur J, Duan SY, Vaas LAI et al. Phenotypic profiling of *Scedosporium aurantiacum*, an opportunistic pathogen colonizing human lungs. *PLoS One*. 2015; 10: e0122354.
180. Irinyi L, Serena C, Garcia-Hermoso D et al. International Society of Human and Animal Mycology (ISHAM)-ITS reference DNA barcoding database: the quality controlled standard tool for routine identification of human and animal pathogenic fungi. *Med Mycol*. 2015; 53: 313–337.
181. Matray O, Mouhadjir A, Giraud S et al. Semi-automated repetitive sequence-based PCR amplification for species of the *Scedosporium apiospermum* complex. *Med Mycol*. 2016; 54: 409–419.
182. Bernhard M, Zautner AE, Steinmann J, Weig M, Gro  U, Bader O. Towards proteomic species barcoding of fungi - An example using *Scedosporium/Pseudallescheria* complex isolates. *Fungal Biol*. 2016; 120: 162–165.
183. Coulibaly O, Marinach-Patrice C, Cassagne C, Piarroux R, Mazier D, Ranque S. *Pseudallescheria/Scedosporium* complex species identification by Matrix-Assisted Laser Desorption Ionization Time-Of-Flight Mass Spectrometry. *Med Mycol*. 2011; 49: 621–626.
184. Sitterl  E, Giraud S, Leto J et al. Matrix-assisted laser desorption ionization-time of flight mass spectrometry for fast and accurate identification of *Pseudallescheria/Scedosporium* species. *Clin Microbiol Infect*. 2014; 20: 929–935.
185. Sleiman S, Halliday CL, Chapman B et al. Performance of Matrix-Assisted Laser Desorption Ionization-Time of Flight Mass Spectrometry for Identification of *Aspergillus*, *Scedosporium*, and *Fusarium* spp. in the Australian Clinical Setting. *J Clin Microbiol*. 2016; 54: 2182–2186.
186. Bacconi A, Richmond GS, Baroldi MA et al. Improved sensitivity for molecular detection of bacterial and *Candida* infections in blood. *J Clin Microbiol*. 2014; 52: 3164–3174.
187. Metzgar D, Frinder M, Lovari R et al. Broad-spectrum biosensor capable of detecting and identifying diverse bacterial and *Candida* species in blood. *J Clin Microbiol*. 2013; 51: 2670–2678.
188. Alanio A, Garcia-hermoso D, Mercier-delarue S et al. Molecular identification of Mucorales in human tissues: contribution of PCR electrospray ionization mass spectrometry. *Clin Microbiol Infect*. 2015; 21: e1–5.
189. Shin JH, Ranken R, Sefers SE et al. Detection, identification, and distribution of fungi in bronchoalveolar lavage specimens by use of multilocus PCR coupled with electrospray ionization/mass spectrometry. *J Clin Microbiol*. 2013; 51: 136–141.
190. Mylonakis E, Clancy CJ, Ostrosky-Zeichner L et al. T2 magnetic resonance assay for the rapid diagnosis of candidemia in whole blood: A clinical trial. *Clin Infect Dis*. 2015; 60: 892–899.
191. Pfaller MA, Wolk DM, Lowery TJ. T2MR and T2Candida: novel technology for the rapid diagnosis of candidemia and invasive candidiasis. *Future Microbiol*. 2016; 11: 103–117.
192. Alanio A, Bretagne S. Performance evaluation of multiplex PCR including *Aspergillus*-not so simple! *Med Mycol*. 2017; 55: 56–62.
193. Thornton CR. Tracking the emerging human pathogen *Pseudallescheria boydii* by using highly specific monoclonal antibodies. *Clin Vaccine Immunol*. 2009; 16: 756–764.
194. Krasny L, Strohal M, Bouchara JP et al. *Scedosporium* and *Pseudallescheria* low molecular weight metabolites revealed by database search. *Mycoses*. 2011; 54: 37–42.
195. Kuroda K, Yoshida M, Uosaki Y et al. AS-183, A novel inhibitor of Acyl-CoA: Cholesterol acyltransferase produced by *Scedosporium* sp. SPC-15549. *J Antibiot (Tokyo)*. 1993; 46: 1196–1202.
196. Prichystal J, Schug KA, Lemr K, Novak J, Havlicek V. Structural analysis of natural products. *Anal Chem*. 2016; 88: 10338–10346.
197. Pluhacek T, Lemr K, Ghosh D, Milde D, Novak J, Havlicek V. Characterization of microbial siderophores by mass spectrometry. *Mass Spectrom Rev*. 2016; 35: 35–47.
198. Novak J, Sokolova L, Lemr K et al. Batch-processing of imaging or liquid-chromatography mass spectrometry datasets and de novo sequencing of polyketide siderophores. *Biochim Biophys Acta - Proteins Proteomics*. doi.org/10.1016/j.bbapap.2016.12.003.
199. Nov k J, Lemr K, Schug KA, Havl ek V. CycloBranch: De novo sequencing of nonribosomal peptides from accurate product ion mass spectra. *J Am Soc Mass Spectrom*. 2015; 26: 1780–1786.
200. Tortorano AM, Richardson M, Roilides E et al. ESCMID and ECMM joint guidelines on diagnosis and management of hyalohyphomycosis: *Fusarium* spp., *Scedosporium* spp. and others. *Clin Microbiol Infect*. 2014; 20: 27–46.
201. Pellon A, Ramirez-Garcia A, Buldain I et al. Pathobiology of *Lomentospora prolificans*: could this species serve as a model of primary antifungal resistance? *Int J Antimicrob Agents*. 2017. doi:10.1016/j.ijantimicag.2017.06.009.
202. Osheroev N, Kontoyiannis DP. The anti-Aspergillus drug pipeline: Is the glass half full or empty? In: *Medical Mycology*. 2017; 55: 118–124.
203. Perfect JR. The antifungal pipeline: a reality check. *Nat Rev Drug Discov*. 2017. doi:10.1038/nrd.2017.46.
204. Troke P, Aguirrebengoa K, Arteaga C et al. Treatment of scedosporiosis with voriconazole: clinical experience with 107 patients. *Antimicrob Agents Chemother*. 2008; 52: 1743–1750.
205. Buzina W, Feierl G, Haas D et al. Lethal brain abscess due to the fungus *Scedosporium apiospermum* (teleomorph *Pseudallescheria boydii*) after a near-drowning incident: case report and review of the literature. *Med Mycol*. 2006; 44: 473–477.
206. Martin-Vicente A, Guarro J, Gonz lez GM, Lass-Fl rl C, Lackner M, Capilla J. Voriconazole MICs are predictive for the outcome of experimental disseminated scedosporiosis. *J Antimicrob Chemother*. 2017; 72: 1118–1122.
207. Cuenca-Estrella M, Alastruey-Izquierdo A, Alcazar-Fuoli L et al. In vitro activities of 35 double combinations of antifungal agents against *Scedosporium apiospermum* and *Scedosporium prolificans*. *Antimicrob Agents Chemother*. 2008; 52: 1136–1139.
208. Yustes C, Guarro J. In vitro synergistic interaction between amphotericin B and micafungin against *Scedosporium* spp. *Antimicrob Agents Chemother*. 2005; 49: 3498–3500.
209. Steinbach WJ, Schell WA, Miller JL, Perfect JR. *Scedosporium prolificans* osteomyelitis in an immunocompetent child treated with voriconazole and caspofungin, as well as locally applied polyhexamethylene biguanide. *J Clin Microbiol*. 2003; 41: 3981–3985.
210. Meletiadis J, Mouton JW, Meis JFGM, Verweij PE. In vitro drug interaction modeling of combinations of azoles with terbinafine against clinical *Scedosporium prolificans* isolates. *Antimicrob Agents Chemother*. 2003; 47: 106–117.
211. Meletiadis J, Mouton JW, Rodriguez-Tudela JL, Meis JFGM, Verweij PE. In vitro interaction of terbinafine with itraconazole against clinical isolates of *Scedosporium prolificans*. *Antimicrob Agents Chemother*. 2000; 44: 470–472.
212. Ochi Y, Hiramoto N, Takegawa H et al. Infective endocarditis caused by *Scedosporium prolificans* infection in a patient with acute myeloid leukemia undergoing induction chemotherapy. *Int J Hematol*. 2015; 101: 620–625.

213. Ananda-Rajah MR, Grigg A, Slavin MA. Breakthrough disseminated *Scedosporium prolificans* infection in a patient with relapsed leukaemia on prolonged voriconazole followed by posaconazole prophylaxis. *Mycopathologia*. 2008; 166: 83–86.
214. Uno K, Kasahara K, Kutsuna S et al. Infective endocarditis and meningitis due to *Scedosporium prolificans* in a renal transplant recipient. *J Infect Chemother*. 2014; 20: 131–133.
215. Nishimori M, Takahashi T, Suzuki E et al. Fatal fungemia with *Scedosporium prolificans* in a patient with acute myeloid leukemia. *Japanese J Med Mycol*. 2014; 55: E63–E70.
216. Bhat S V, Paterson DL, Rinaldi MG, Veldkamp PJ. *Scedosporium prolificans* brain abscess in a patient with chronic granulomatous disease: successful combination therapy with voriconazole and terbinafine. *Scand J Infect Dis*. 2007; 39: 87–90.
217. Gosbell IB, Toumasatos V, Yong J, Kuo RS, Ellis DH, Perrie RC. Cure of orthopaedic infection with *Scedosporium prolificans*, using voriconazole plus terbinafine, without the need for radical surgery. *Mycoses*. 2003; 46: 233–236.
218. Howden BP, Slavin MA, Schwarer AP, Mijch AM. Successful control of disseminated *Scedosporium prolificans* infection with a combination of voriconazole and terbinafine. *Eur J Clin Microbiol Infect Dis*. 2003; 22: 111–113.
219. Li JYZ, Yong TY, Grove DI, Coates PTH. Successful control of *Scedosporium prolificans* septic arthritis and probable osteomyelitis without radical surgery in a long-term renal transplant recipient. *Transpl Infect Dis*. 2008; 10: 63–65.
220. Studahl M, Backteman T, Stalhammar F, Chryssanthou E, Petrini B. Bone and joint infection after traumatic implantation of *Scedosporium prolificans* treated with voriconazole and surgery. *Acta Paediatr*. 2003; 92: 980–982.
221. Tong SYC, Peleg AY, Yoong J, Handke R, Szer J, Slavin M. Breakthrough *Scedosporium prolificans* infection while receiving voriconazole prophylaxis in an allogeneic stem cell transplant recipient. *Transpl Infect Dis*. 2007; 9: 241–243.
222. Rodríguez MM, Calvo E, Serena C, Mariné M, Pastor FJ, Guarro J. Effects of double and triple combinations of antifungal drugs in a murine model of disseminated infection by *Scedosporium prolificans*. *Antimicrob Agents Chemother*. 2009; 53: 2153–2155.
223. Martin-Vicente A, Guarro J, Capilla J. Does a triple combination have better activity than double combinations against multiresistant fungi? Experimental in vitro evaluation. *Int J Antimicrob Agents*. 2017; 49: 422–426.
224. Galgóczy L, Homa M, Papp T, Manikandan P, Vágvölgyi C. In vitro antifungal activity of cysteine derivatives and their combinations with antifungal agents against clinically relevant *Scedosporium* species. *Int J Clin Med Microbiol*. 2016; 1: 111.
225. Homa M, Galgóczy L, Tóth E et al. In vitro antifungal activity of antipsychotic drugs and their combinations with conventional antifungals against *Scedosporium* and *Pseudallescheria* isolates. *Med Mycol*. 2015; 53: 890–895.
226. Biswas C, Sorrell TC, Djordjevic JT, Zuo X, Jolliffe KA, Chen SCA. In vitro activity of miltefosine as a single agent and in combination with voriconazole or posaconazole against uncommon filamentous fungal pathogens. *J Antimicrob Chemother*. 2013; 68: 2842–2846.
227. Blatzer M, Blum G, Jukic E et al. Blocking Hsp70 enhances the efficiency of amphotericin B treatment against resistant *Aspergillus terreus* strains. *Antimicrob Agents Chemother*. 2015; 59: 3778–3788.
228. Cowen LE. The fungal Achilles' heel: Targeting Hsp90 to cripple fungal pathogens. *Curr Opin Microbiol*. 2013; 16: 377–384.
229. Cowen LE, Singh SD, Koehler JR et al. Harnessing Hsp90 function as a powerful, broadly effective therapeutic strategy for fungal infectious disease. *Proc Natl Acad Sci U S A*. 2009; 106: 2818–2823.
230. Steinbach WJ, Reedy JL, Cramer RA, Perfect JR, Heitman J. Harnessing calcineurin as a novel anti-infective agent against invasive fungal infections. *Nat Rev Microbiol*. 2007; 5: 418–430.
231. Pfaller MA, Messer SA, Georgopapadakou N, Martell LA, Besterman JM, Diekema DJ. Activity of MGCD290, a Hos2 histone deacetylase inhibitor, in combination with azole antifungals against opportunistic fungal pathogens. *J Clin Microbiol*. 2009; 47: 3797–3804.
232. Pfaller MA, Rhomberg PR, Messer SA, Castanheira M. In vitro activity of a Hos2 deacetylase inhibitor, MGCD290, in combination with echinocandins against echinocandin-resistant *Candida* species. *Diagn Microbiol Infect Dis*. 2015; 81: 259–263.
233. Robbins N, Spitzer M, Yu T et al. An antifungal combination matrix identifies a rich pool of adjuvant molecules that enhance drug activity against diverse fungal pathogens. *Cell Rep*. 2015; 13: 1481–1492.
234. Ortoneda M, Capilla J, Pujol I et al. Liposomal amphotericin B and granulocyte colony-stimulating factor therapy in a murine model of invasive infection by *Scedosporium prolificans*. *J Antimicrob Chemother*. 2002; 49: 525–529.
235. Ortoneda M, Capilla J, Pastor FJ, Serena C, Guarro J. Interaction of granulocyte colony-stimulating factor and high doses of liposomal amphotericin B in the treatment of systemic murine scedosporiosis. *Diagn Microbiol Infect Dis*. 2004; 50: 247–251.
236. Martinez M, Chen V, Tong AJ, Hamilton K, Clemons K V., Stevens DA. Experimental evidence that granulocyte transfusions are efficacious in treatment of neutropenic hosts with pulmonary aspergillosis. *Antimicrob Agents Chemother*. 2013; 57: 1882–1887.
237. Ravikumar S, Win MS, Chai LYA. Optimizing outcomes in immunocompromised hosts: Understanding the role of immunotherapy in invasive fungal diseases. *Front Microbiol*. 2015; 6: 1322.
238. Holle J, Leichsenring M, Meissner PE. Nebulized voriconazole in infections with *Scedosporium apiospermum*—case report and review of the literature. *J Cyst Fibros*. 2014; 13: 400–402.
239. Padoan R, Poli P, Colombrita D, Borghi E, Timpano S, Berlucchi M. Acute *Scedosporium apiospermum* endobronchial infection in cystic fibrosis. *Pediatr Infect Dis J*. 2016; 35: 701–702.
240. Rolfe NE, Haddad TJ, Wills TS. Management of *Scedosporium apiospermum* in a pre- and post-lung transplant patient with cystic fibrosis. *Med Mycol Case Rep*. 2013; 2: 37–39.
241. Miyazaki M, Horii T, Hata K et al. In vitro activity of E1210, a novel antifungal, against clinically important yeasts and molds. *Antimicrob Agents Chemother*. 2011; 55: 4652–4658.
242. Hata K, Horii T, Miyazaki M et al. Efficacy of oral E1210, a new broad-spectrum antifungal with a novel mechanism of action, in murine models of candidiasis, aspergillosis, and fusariosis. *Antimicrob Agents Chemother*. 2011; 55: 4543–4551.
243. Castanheira M, Duncanson FP, Diekema DJ, Guarro J, Jones RN, Pfaller MA. Activities of E1210 and comparator agents tested by CLSI and EUCAST broth microdilution methods against *Fusarium* and *Scedosporium* species identified using molecular methods. *Antimicrob Agents Chemother*. 2012; 56: 352–357.
244. Johnson ME, Katiyar SK, Edlind TD. New Fks hot spot for acquired echinocandin resistance in *Saccharomyces cerevisiae* and its contribution to intrinsic resistance of *Scedosporium* species. *Antimicrob Agents Chemother*. 2011; 55: 3774–3781.
245. Debeljak N, Fink M, Rozman D. Many facets of mammalian lanosterol 14 $\alpha$ -demethylase from the evolutionarily conserved cytochrome P450 family CYP51. *Arch Biochem Biophys*. 2003; 409: 159–171.
246. Albarrag AM, Anderson MJ, Howard SJ et al. Interrogation of related clinical pan-azole-resistant *Aspergillus fumigatus* strains: G138C, Y431C, and G434C single nucleotide polymorphisms in cyp51A, upregulation of cyp51A, and integration and activation of transposon Atf1 in the cyp51A promoter. *Antimicrob Agents Chemother*. 2011; 55: 5133–5121.
247. Stensvold C, Jørgensen L, Arendrup M. Azole-resistant invasive aspergillosis: relationship to agriculture. *Curr Fungal Infect Rep*. 2012; 6: 178–191.
248. Fraczek MG, Bromley M, Buied A et al. The cdr1B efflux transporter is associated with non-cyp51a-mediated itraconazole resistance in *Aspergillus fumigatus*. *J Antimicrob Chemother*. 2013; 68: 1486–1496.
249. Verweij PE, Chowdhary A, Melchers WJG, Meis JF. Azole resistance in *Aspergillus fumigatus*: Can we retain the clinical use of mold-active antifungal azoles? *Clin Infect Dis*. 2016; 62: 362–368.

250. Pellon A, Ramirez-Garcia A, Buldain I, Antoran A, Rementeria A, Hernandez FL. Molecular and cellular responses of the pathogenic fungus *Lomentospora prolificans* to the antifungal drug voriconazole. *PLoS One*. 2017; 12: e0174885.
251. Oliver JD, Sibley GE, Beckmann N et al. F901318 represents a novel class of antifungal drug that inhibits dihydroorotate dehydrogenase. *Proc Natl Acad Sci U S A*. 2016; pii: 201608304.
252. Wiederhold NP, Law D, Birch M. Dihydroorotate dehydrogenase inhibitor F901318 has potent in vitro activity against *Scedosporium* species and *Lomentospora prolificans*. *J Antimicrob Chemother*. 2017. doi:10.1093/jac/dkx065.
253. Grisham MB, Jefferson MM, Melton DF, Thomas EL. Chlorination of endogenous amines by isolated neutrophils. Ammonia-dependent bactericidal, cytotoxic, and cytolytic activities of the chloramines. *J Biol Chem*. 1984; 259: 10404–10413.
254. Marcinkiewicz J, Kontny E. Taurine and inflammatory diseases. *Amino Acids*. 2014; 46: 7–20.
255. Gottardi W, Nagl M. Chemical properties of N-chlorotaurine sodium, a key compound in the human defence system. *Arch Pharm (Weinheim)*. 2002; 335: 411–421.
256. Gottardi W, Nagl M. N-chlorotaurine, a natural antiseptic with outstanding tolerability. *J Antimicrob Chemother*. 2010; 65: 399–409.
257. Gottardi W, Debabov D, Nagl M. N-chloramines, A promising class of well-tolerated topical anti-infectives. *Antimicrob Agents Chemother*. 2013; 57: 1107–1114.
258. Gottardi W, Nagl M. Chlorine covers on living bacteria: The initial step in antimicrobial action of active chlorine compounds. *J Antimicrob Chemother*. 2005; 55: 475–482.
259. Geiger R, Treml B, Pinna A et al. Tolerability of inhaled N-chlorotaurine in the pig model. *BMC Pulm Med*. 2009; 9: 33.
260. Nagl M, Mair C, Dietrich H et al. Tolerability of inhaled N-chlorotaurine versus sodium chloride in the mouse. *J Med Res Pract*. 2013; 2: 163–170.
261. Schwienbacher M, Treml B, Pinna A et al. Tolerability of inhaled N-chlorotaurine in an acute pig streptococcal lower airway inflammation model. *BMC Infect Dis*. 2011; 11: 231.
262. Lackner M, Binder U, Reindl M et al. N-Chlorotaurine exhibits fungicidal activity against therapy-refractory *Scedosporium* species and *Lomentospora prolificans*. *Antimicrob Agents Chemother*. 2015; 59: 6454–6462.
263. Gruber M, Moser I, Nagl M, Lackner M. Bactericidal and fungicidal activity of N-chlorotaurine is enhanced in cystic fibrosis sputum medium. *Antimicrob Agents Chemother*. 2017; 61: e02527–16.
